# Supplementary material
Source: publisher figshare collection journal article supplement (https://acs.figshare.com/ndownloader/files/4006627)

## Catalytic C-C Bond Formation Promoted by Organo- and Amido-Magnesium(II) Compounds

Ryan J. Schwamm, Martyn P. Coles\*

School of Chemical and Physical Sciences, Victoria University of Wellington, PO Box 600, Wellington, New Zealand

| Page | Content                                                                                                                                                                                                                                                                                                                                                                  |
|------|--------------------------------------------------------------------------------------------------------------------------------------------------------------------------------------------------------------------------------------------------------------------------------------------------------------------------------------------------------------------------|
| 3    | Experimental Procedures                                                                                                                                                                                                                                                                                                                                                  |
| 9    | <b>Fig. S1</b> $^1\text{H}$ NMR Spectrum of $\text{Mg}(\text{mesC}\{\text{NCy}\}_2)(\text{N}\{\text{SiMe}_3\}_2)(\text{THF})$ ( <b>1</b> )                                                                                                                                                                                                                               |
| 10   | <b>Fig. S2</b> $^1\text{H}$ NMR Spectrum of $\text{Mg}(\text{mesC}\{\text{NCy}\}_2)(\text{THF})$ ( <b>2</b> )                                                                                                                                                                                                                                                            |
| 11   | <b>Fig. S3</b> $^{13}\text{C}\{^1\text{H}\}$ NMR Spectrum of $\text{Mg}(\text{mesC}\{\text{NCy}\}_2)(\text{THF})$ ( <b>2</b> )                                                                                                                                                                                                                                           |
| 12   | <b>Fig. S4</b> $^1\text{H}$ NMR Spectrum of $\text{Mg}(\{\text{Me}_3\text{Si}\}_2\text{NC}\{\text{Ni-Pr}\}_2)(\text{THF})$ ( <b>3</b> )                                                                                                                                                                                                                                  |
| 13   | <b>Fig. S5</b> $^{13}\text{C}\{^1\text{H}\}$ NMR Spectrum of $\text{Mg}(\{\text{Me}_3\text{Si}\}_2\text{NC}\{\text{Ni-Pr}\}_2)(\text{THF})$ ( <b>3</b> )                                                                                                                                                                                                                 |
| 14   | <b>Fig. S6</b> $^1\text{H}$ NMR Spectrum of $\text{Mg}(\text{C}\equiv\text{CPh})_2(\text{THF})_4$ ( <b>4</b> )                                                                                                                                                                                                                                                           |
| 15   | <b>Fig. S7</b> $^{13}\text{C}\{^1\text{H}\}$ NMR Spectrum of $\text{Mg}(\text{C}\equiv\text{CPh})_2(\text{THF})_4$ ( <b>4</b> )                                                                                                                                                                                                                                          |
| 16   | <b>Fig. S8</b> $^1\text{H}$ NMR Spectrum of $\text{Mg}(\text{PhC}\equiv\text{C}\{\text{Ni-Pr}\}_2)(\text{THF})_2$ ( <b>5</b> )                                                                                                                                                                                                                                           |
| 17   | <b>Fig. S9</b> $^{13}\text{C}\{^1\text{H}\}$ NMR Spectrum of $\text{Mg}(\text{PhC}\equiv\text{C}\{\text{Ni-Pr}\}_2)(\text{THF})_2$ ( <b>5</b> )                                                                                                                                                                                                                          |
| 18   | <b>Fig. S10</b> $^1\text{H}$ NMR Spectrum of $\text{Mg}(\text{PhC}\equiv\text{C}\{\text{Ni-Pr}\}_2)\text{Br}(\text{Et}_2\text{O})$ ( <b>6</b> )                                                                                                                                                                                                                          |
| 19   | <b>Fig. S11</b> $^{13}\text{C}\{^1\text{H}\}$ NMR Spectrum of $\text{Mg}(\text{PhC}\equiv\text{C}\{\text{Ni-Pr}\}_2)\text{Br}(\text{Et}_2\text{O})$ ( <b>6</b> )                                                                                                                                                                                                         |
| 20   | <b>Fig. S12</b> $^1\text{H}$ NMR Spectrum of $\text{Mg}(\text{mesC}\{\text{NCy}\}_2)(\text{C}\equiv\text{CPh})(\text{THF})$ ( <b>A</b> )                                                                                                                                                                                                                                 |
| 21   | <b>Fig. S13</b> $^{13}\text{C}\{^1\text{H}\}$ NMR Spectrum of $\text{Mg}(\text{mesC}\{\text{NCy}\}_2)(\text{C}\equiv\text{CPh})(\text{THF})$ ( <b>A</b> )                                                                                                                                                                                                                |
| 22   | <b>Fig. S14</b> $^1\text{H}$ NMR Spectrum of the NMR scale reaction of <b>1</b> with one equivalent $i\text{Pr-N}=\text{C}=\text{Ni-Pr}$                                                                                                                                                                                                                                 |
| 23   | <b>Fig. S15</b> $^{13}\text{C}\{^1\text{H}\}$ NMR Spectrum of a mixture of $\text{Mg}(\text{mesC}\{\text{NCy}\}_2)(\text{THF})$ ( <b>2</b> ), $\text{Mg}(\{\text{Me}_3\text{Si}\}_2\text{NC}\{\text{Ni-Pr}\}_2)(\text{THF})$ ( <b>3</b> ) and $\text{Mg}(\text{mesC}\{\text{NCy}\}_2)(\{\text{Me}_3\text{Si}\}_2\text{NC}\{\text{Ni-Pr}\}_2)(\text{THF})_n$ ( <b>B</b> ) |
| 24   | <b>Fig. S16</b> $^1\text{H}$ NMR Spectrum of the NMR scale reaction of <b>A</b> with one equivalent $i\text{Pr-N}=\text{C}=\text{Ni-Pr}$                                                                                                                                                                                                                                 |
| 25   | <b>Fig. S17</b> $^{13}\text{C}\{^1\text{H}\}$ NMR Spectrum of a mixture of $\text{Mg}(\text{mesC}\{\text{NCy}\}_2)(\text{THF})$ ( <b>2</b> ), $\text{Mg}(\text{PhC}\equiv\text{C}\{\text{Ni-Pr}\}_2)(\text{THF})_2$ ( <b>5</b> ) and $\text{Mg}(\text{mesC}\{\text{NCy}\}_2)(\text{PhC}\equiv\text{C}\{\text{Ni-Pr}\}_2)(\text{THF})_n$ ( <b>C</b> )                     |

|    |                 |                                                                                                                                                                 |
|----|-----------------|-----------------------------------------------------------------------------------------------------------------------------------------------------------------|
| 26 | <b>Fig. S18</b> | Stacked $^1\text{H}$ NMR plot of catalytic coupling of $\text{PhC}\equiv\text{CH}$ + $i\text{-PrN}=\text{C}=\text{Ni-Pr}$ with <b>1</b> (Room Temp)             |
| 27 | <b>Fig. S19</b> | Stacked $^1\text{H}$ NMR plot of catalytic coupling of $\text{PhC}\equiv\text{CH}$ + $i\text{-PrN}=\text{C}=\text{Ni-Pr}$ with <b>1</b> (50 °C)                 |
| 28 | <b>Fig. S20</b> | Stacked $^1\text{H}$ NMR plot of catalytic coupling of $\text{PhC}\equiv\text{CH}$ + $i\text{-PrN}=\text{C}=\text{Ni-Pr}$ with <b>1</b> (80 °C)                 |
| 29 | <b>Fig. S21</b> | Assigned $^1\text{H}$ NMR spectrum of catalytic coupling of $\text{PhC}\equiv\text{CH}$ + $i\text{-PrN}=\text{C}=\text{Ni-Pr}$ with <b>1</b> (80 °C, 1876 mins) |
| 30 | <b>Fig. S22</b> | $^1\text{H}$ NMR Spectrum of $\text{PhC}\equiv\text{C}\{\text{Ni-Pr}\}_2\{\text{NH}i\text{-Pr}\}$                                                               |
| 31 | <b>Table S1</b> | Crystal structure and refinement data for $\text{Mg}(\text{mesC}\{\text{NCy}\}_2)_2(\text{THF})$ ( <b>2</b> )                                                   |
| 32 | <b>Fig. S23</b> | ORTEP of $\text{Mg}(\text{mesC}\{\text{NCy}\}_2)_2(\text{THF})$ ( <b>2</b> )                                                                                    |
| 33 | <b>Table S2</b> | Crystal structure and refinement data for $\text{Mg}(\{\text{Me}_3\text{Si}\}_2\text{NC}\{\text{Ni-Pr}\}_2)_2(\text{THF})$ ( <b>3</b> )                         |
| 34 | <b>Fig. S24</b> | ORTEP of $\text{Mg}(\{\text{Me}_3\text{Si}\}_2\text{NC}\{\text{Ni-Pr}\}_2)_2(\text{THF})$ ( <b>3</b> )                                                          |
| 35 | <b>Table S3</b> | Crystal structure and refinement data for $\text{Mg}(\text{C}\equiv\text{CPh})_2(\text{THF})_4$ ( <b>4</b> )                                                    |
| 36 | <b>Fig. S25</b> | ORTEP of $\text{Mg}(\text{C}\equiv\text{CPh})_2(\text{THF})_4$ ( <b>4</b> )                                                                                     |
| 37 | <b>Table S4</b> | Crystal structure and refinement data for $\text{Mg}(\text{PhC}\equiv\text{C}\{\text{Ni-Pr}\}_2)_2(\text{THF})_2$ ( <b>5</b> (THF))                             |
| 38 | <b>Fig. S26</b> | ORTEP of $\text{Mg}(\text{PhC}\equiv\text{C}\{\text{Ni-Pr}\}_2)_2(\text{THF})_2$ ( <b>5</b> (THF))                                                              |
| 39 | <b>Table S5</b> | Crystal structure and refinement data for $[\text{Mg}(\text{PhC}\equiv\text{C}\{\text{Ni-Pr}\}_2)\text{Br}(\text{Et}_2\text{O})]_2$ ( <b>[6]</b> <sub>2</sub> ) |
| 40 | <b>Fig. S27</b> | ORTEP of $[\text{Mg}(\text{PhC}\equiv\text{C}\{\text{Ni-Pr}\}_2)\text{Br}(\text{Et}_2\text{O})]_2$ ( <b>[6]</b> <sub>2</sub> )                                  |

## Experimental Procedures

### General

All manipulations were carried out under dry nitrogen using standard Schlenk-line and cannula techniques, or in a conventional nitrogen-filled glovebox. Solvents were dried using a PureSolv. system (Innovative Technologies). NMR spectra were recorded in C<sub>6</sub>D<sub>6</sub> at 298 K (unless otherwise stated), using a Varian INOVA system at 300 MHz (<sup>1</sup>H) or 75 MHz (<sup>13</sup>C{<sup>1</sup>H}). Proton and carbon chemical shifts were referenced internally to residual solvent resonances. Elemental analyses were performed S. Boyer at London Metropolitan University. All compounds were purchased from Sigma-Aldrich chemical company. Liquids were subjected to 3 x freeze-pump-thaw cycles, and stored under nitrogen in the glovebox. Compound **1** was made according to literature procedures.<sup>1</sup>

### Mg(mesC{NCy}<sub>2</sub>)<sub>2</sub>(THF) (**2**)

Compound **2** was isolated from the attempted preparation of **A** (see below for details). Anal. Calcd. for C<sub>48</sub>H<sub>74</sub>N<sub>4</sub>MgO (747.43): C, 77.13; H, 9.98; N, 7.50 %. Found: C, 76.86; H, 10.12; N, 7.56 %. <sup>1</sup>H NMR: δ 6.85 (s, 4H, C<sub>6</sub>H<sub>2</sub>), 3.74 (m, 4H, THF-CH<sub>2</sub>), 2.87 (m, 4H, α-C<sub>6</sub>H<sub>11</sub>), 2.47 (s, 12H, 2,6-Me<sub>2</sub>), 2.13 (s, 6H, 4-Me), 2.13-1.23 (m, 40H, C<sub>6</sub>H<sub>11</sub>), 1.45 (THF-CH<sub>2</sub>). <sup>13</sup>C NMR: δ 174.3 (CN<sub>2</sub>), 136.7, 134.2, 134.1, 128.4 (C<sub>6</sub>H<sub>2</sub>), 67.9 (THF-CH<sub>2</sub>), 54.7 (α-C<sub>6</sub>H<sub>11</sub>), 37.8, 26.5, 25.9 (C<sub>6</sub>H<sub>11</sub>), 25.8 (THF-CH<sub>2</sub>), 21.2 (4-Me), 20.7 (2,6-Me).

### Mg({Me<sub>3</sub>Si}<sub>2</sub>NC{Ni-Pr}<sub>2</sub>)<sub>2</sub>(THF) (**3**)

A solution of *N,N'*-diisopropylcarbodiimide (0.12 mL, 0.73 mmol.) in THF (5 mL) was added dropwise to a stirring solution of Mg(N{SiMe<sub>3</sub>}<sub>2</sub>)<sub>2</sub> (0.25 g, 0.73 mmol.) in THF (5 mL). The resulting solution was stirred at room temperature for 24 h followed by concentration of the solution *in vacuo*. Clear, colourless crystals suitable for X-ray diffraction were obtained upon storage of the solution at –

30 °C for 24 h. Yield 0.31 g, 78 %. Anal. Calcd. for  $C_{30}H_{72}N_6MgOSi_4$  (669.58): C, 53.81; H, 10.84; N, 12.55 %. Found: C, 53.60; H, 10.77; N, 12.54 %.  $^1H$  NMR:  $\delta$  3.69 (sept,  $J_{HH} = 6.2$  Hz, 4H,  $CH(CH_3)_2$ ), 3.59, 1.41 (m, 4H, THF- $CH_2$ ), 1.17 (d,  $J_{HH} = 6.2$  Hz, 24H,  $CH(CH_3)_2$ ), 0.32 (s, 36H,  $N\{SiMe_3\}_2$ ).  $^{13}C$  NMR:  $\delta$  167.2 ( $CN_2$ ), 67.9 (THF- $CH_2$ ), 44.7 ( $CH(CH_3)_2$ ), 27.4 ( $CH(CH_3)_2$ ), 25.7 (THF- $CH_2$ ), 2.5 ( $SiMe_3$ ).

#### **Mg(C $\equiv$ CPh) $_2$ (THF) $_4$ (4)**

A solution of  $MgBu_2$  in heptane (1.2 mL of a 1.0M solution, 1.2 mmol.) was added dropwise to a stirring solution of phenyl acetylene (0.31 mL, 2.4 mmol.) in THF (5 mL). The resultant solution was stirred for 24 h followed by removal of the solvent *in vacuo* to give a white powder. Clear colourless crystals were obtained by recrystallisation from a hexane/THF solution. Yield 0.54 g, 84 %.  $^1H$  NMR:  $\delta$  7.89 (d,  $J_{HH} = 7.2$  Hz, 2H, *o*- $C_6H_5$ ), 7.10 (t,  $J_{HH} = 7.2$  Hz, 2H, *p*- $C_6H_5$ ), 7.00 (d,  $J_{HH} = 7.2$  Hz, 4H, *m*- $C_6H_5$ ), 3.61, 1.40 (m, THF- $CH_2$ ).  $^{13}C$  NMR:  $\delta^*$  132.2, 129.3, 128.5, 127.0 ( $C_6H_5$ ), 68.0, 25.8 THF- $CH_2$ ). \* Resonances for the  $C\equiv C$  carbons not observed.

#### **Mg(PhC $\equiv$ CC{Ni-Pr} $_2$ )(THF) $_2$ (5)**

A solution of  $MgBu_2$  in heptane (0.88 mL of a 1.0 M solution, 0.88 mmol.) was added drop wise to a stirring solution of  $PhC\equiv CC\{Ni-Pr\}\{NH_2-Pr\}$  (0.40 g, 1.8 mmol.) in THF (5 mL). The solution was allowed to stir for 24 h followed by removal of the volatiles. Clear yellow crystals suitable for X-ray analysis were obtained by recrystallization from hexane at -30 °C. Yield 0.36 g, 66 %. Anal. Calcd. for  $C_{38}H_{54}N_4MgO_2$  (623.17): C, 73.24; H, 8.73; N, 8.99 %. Found: C, 73.15; H, 8.61; N, 9.05 %.  $^1H$  NMR:  $\delta$  7.48 (m, 4H, *o*- $C_6H_5$ ), 6.95 (m, 6H, *m*- and *p*- $C_6H_5$ ), 4.38 (sept,  $J_{HH} = 6.4$  Hz, 4H,  $CH(CH_3)_2$ ), 3.62 (m, THF- $CH_2$ ), 1.44 (d,  $J_{HH} = 6.4$  Hz, 24H,  $CH(CH_3)_2$ ), 1.34 (m, THF- $CH_2$ ).  $^{13}C$  NMR:  $\delta$  157.9 ( $CN_2$ ), 132.3, 128.9, 128.7, 123.1 ( $C_6H_5$ ), 95.9, 80.8 ( $C\equiv C$ ), 68.0 (THF- $CH_2$ ), 48.9 ( $CH(CH_3)_2$ ), 26.7 ( $CH(CH_3)_2$ ), 25.6 (THF- $CH_2$ ).

**Mg(PhC≡CC{N-*i*-Pr}<sub>2</sub>)Br(OEt<sub>2</sub>) (6)**

A solution of MeMgBr in Et<sub>2</sub>O (0.48 mL of a 3.0 M solution, 1.45 mmol.) was added drop wise to a stirring solution of PhC≡CC{Ni-Pr}{NH<sub>i</sub>-Pr} (0.33 g, 1.45 mmol.) in Et<sub>2</sub>O (5 mL). The resultant solution was left to stir for 24 h, followed by concentration to ca. 1 mL and storage at -30 °C. Yellow crystals of **6** were obtained after 24 h. Yield 0.47 g, 81 %. Anal. Calcd. for C<sub>19</sub>H<sub>29</sub>MgN<sub>2</sub>OBr (405.66): C, 56.26; H, 7.21; N, 6.91 %. Found: C, 56.05; H, 7.27; N, 6.75 %. <sup>1</sup>H NMR: δ 7.38 (br, 2H, *o*-C<sub>6</sub>H<sub>5</sub>), 6.94 (m, 3H, *m*- and *p*-C<sub>6</sub>H<sub>5</sub>), 4.35 (br sept, 2H, CH(CH<sub>3</sub>)<sub>2</sub>), 3.53 (q, *J*<sub>HH</sub> = 6.9 Hz, 4H, CH<sub>2</sub>CH<sub>3</sub>), 1.73, 1.52 (br d, 12H, CH(CH<sub>3</sub>)<sub>2</sub>), 1.07 (t, *J*<sub>HH</sub> = 6.9 Hz, 6H, CH<sub>2</sub>CH<sub>3</sub>). <sup>13</sup>C NMR (C<sub>6</sub>D<sub>6</sub>, 75 MHz, 298K) δ 158.9 (CN<sub>2</sub>), 132.3, 129.3, 128.7, 122.5 (C<sub>6</sub>H<sub>5</sub>), 97.1, 80.1 (C≡C), 65.6 (CH<sub>2</sub>CH<sub>3</sub>), 49.1 (CH(CH<sub>3</sub>)<sub>2</sub>), 26.1 (CH(CH<sub>3</sub>)<sub>2</sub>), 14.7 (CH<sub>2</sub>CH<sub>3</sub>).

**Mg(mesC{NCy}<sub>2</sub>)(C≡CPh)(THF) (A)***NMR scale*

Phenylacetylene (0.0045 mL, 0.034 mmol.) was added to a J. Young NMR tube charged with a solution of **1** (20 mg, 0.034 mmol.) in C<sub>6</sub>D<sub>6</sub> (0.5 mL). The solution was allowed to sit for 10 mins at room temperature followed by <sup>1</sup>H NMR analysis.

<sup>1</sup>H NMR: δ 7.84 (d, *J*<sub>HH</sub> = 7.2 Hz, 2H, *o*-C<sub>6</sub>H<sub>5</sub>), 7.10 (t, *J*<sub>HH</sub> = 7.2 Hz, 2H, *m*-C<sub>6</sub>H<sub>5</sub>), 7.02 (d, *J*<sub>HH</sub> = 7.2 Hz, 1H, *p*-C<sub>6</sub>H<sub>5</sub>), 6.84 (s, 2H, C<sub>6</sub>H<sub>2</sub>), 3.96 (m, THF-CH<sub>2</sub>), 2.81 (br m, 2H, α-C<sub>6</sub>H<sub>11</sub>), 2.46 (br s, 6H, 2,6-Me<sub>2</sub>), 2.13 (br s, 3H, 4-Me), 1.95-1.00 (m, 24H, C<sub>6</sub>H<sub>11</sub> + THF-CH<sub>2</sub>), 0.09 (s, 18H, HN(SiMe<sub>3</sub>)<sub>2</sub>). <sup>13</sup>C NMR (C<sub>6</sub>D<sub>6</sub>, 75 MHz, 298K) δ 173.9 (CN<sub>2</sub>), 136.6, 134.5, 134.3, 132.2, 129.3, 128.40, 127.4, 126.4 (C<sub>6</sub>H<sub>5</sub> and C<sub>6</sub>H<sub>2</sub>), 120.1, 117.7 (C≡C), 68.9 (THF-CH<sub>2</sub>), 55.9, 55.2 (α-C<sub>6</sub>H<sub>11</sub>), 37.9, 26.4 (br), 26.1, 25.6 (C<sub>6</sub>H<sub>11</sub>), 21.2 (4-Me), 20.8 (2,6-Me), 2.7 (HN(SiMe<sub>3</sub>)<sub>2</sub>).

#### *Attempted isolation of A - preparative scale*

Phenylacetylene (0.065 mL, 0.62 mmol.) was added drop wise to a rapidly stirring solution of **1** (0.36g, 0.62 mmol.) in toluene (10 mL). The resulting solution was left to stir for 24 h at room temperature, followed by removal of volatiles *in vacuo* to give a yellow oil. The addition of hexane (5 mL) and THF (1 mL) to the oil, followed by storage at  $-30\text{ }^{\circ}\text{C}$  for 24 h yielded a white powder, identified as **4** by  $^1\text{H}$  NMR spectroscopy. Yield 0.027 g, 16 %. Additional crops of clear, colourless crystals were obtained by further concentration of the solution identified as **2**. Yield 0.060 g, 26 %.

#### **Mg(mesC{NCy}<sub>2</sub>)(Me<sub>3</sub>Si)<sub>2</sub>NC{Ni-Pr}<sub>2</sub>)(THF)<sub>n</sub> (B)**

##### *NMR scale*

*N,N'*-diisopropylcarbodiimide (0.0056 mL, 0.034 mmol.) was added to a J. Young NMR tube charged with a solution of **1** (20 mg, 0.034 mmol.) in C<sub>6</sub>D<sub>6</sub> (0.5 mL). The solution was allowed to sit for 2 h at room temperature followed by  $^1\text{H}$  NMR analysis, showing formation of a mixture of **2**, **3** and **B**.

$^1\text{H}$  NMR:  $\delta$  6.85 (s, C<sub>6</sub>H<sub>2</sub> {**2**}), 6.82 (s, C<sub>6</sub>H<sub>2</sub> {**B**}), 3.79, 3.51, 3.39 (overlapping sept, CH(CH<sub>3</sub>)<sub>2</sub> {**3/B**}), 3.71 (m, THF-CH<sub>2</sub> {**2/3/B**}), 2.87 (m,  $\alpha$ -C<sub>6</sub>H<sub>11</sub> {**2**}), 2.87 (m,  $\alpha$ -C<sub>6</sub>H<sub>11</sub> {**B**}), 2.47 (s, 2,6-Me<sub>2</sub> {**2**}), 2.42, 2.41 (s, 2,6-Me<sub>2</sub> {**B**}), 2.13 (s, 4-Me {**2**}), 2.12 (s, 4-Me {**2**}), 1.90-1.38 (overlapping m, C<sub>6</sub>H<sub>11</sub> {**2/B**}), 1.42 (m, THF-CH<sub>2</sub> {**2/3/B**}), 1.30, 1.27, 1.26, 1.22, 1.20, 1.18 (overlapping d, CH(CH<sub>3</sub>)<sub>2</sub> {**3/B**}), 1.17 (d, CH(CH<sub>3</sub>)<sub>2</sub> {**3**}), 1.07 (d, CH(CH<sub>3</sub>)<sub>2</sub> {**B**}), 0.37, 0.36, 0.32 (s, N{SiMe<sub>3</sub>}<sub>2</sub> {**B**}), 0.32 (s, N{SiMe<sub>3</sub>}<sub>2</sub> {**3**}).  $^{13}\text{C}$  NMR (C<sub>6</sub>D<sub>6</sub>, 75 MHz, 298K)  $\delta$  174.0 (CN<sub>2</sub> {**2**}), 173.8 (CN<sub>2</sub> {**B**}), 166.4 (CN<sub>3</sub> {**3/B**}), 136.5, 136.4, 134.6, 134.3, 134.2, 128.4 (C<sub>6</sub>H<sub>2</sub> {**2/B**}), 68.1 (THF-CH<sub>2</sub> {**2/3/B**}), 55.3 ( $\alpha$ -C<sub>6</sub>H<sub>11</sub> {**B**}), 54.9 ( $\alpha$ -C<sub>6</sub>H<sub>11</sub> {**2**}), 45.3 (overlapping CH(CH<sub>3</sub>)<sub>2</sub>, {**3/B**}), 37.9, 37.8, 27.5, 27.4, 27.0, 26.5, 26.4, 26.3, 26.2, 26.1, 25.9, 25.6, 25.3, 24.9, 24.8 (C<sub>6</sub>H<sub>11</sub>, CH(CH<sub>3</sub>)<sub>2</sub> and THF-CH<sub>2</sub> {**2/3/B**}), 21.2 (4-Me {**2/B**}), 20.8 (2,6-Me<sub>2</sub> {**B**}), 20.7 (2,6-Me {**2**}).

## Mg(mesC{NCy}<sub>2</sub>)(PhC≡CC{Ni-Pr}<sub>2</sub>) (THF) (C)

### NMR scale

Phenylacetylene (0.0045 mL, 0.034 mmol.) was added to a J. Young NMR tube charged with a solution of **1** (20 mg, 0.034 mmol.) in C<sub>6</sub>D<sub>6</sub> (0.5 mL). The solution was allowed to sit for 2 h at room temperature followed by the addition of *N,N'*-diisopropylcarbodiimide (0.0056 mL, 0.034 mmol.). <sup>1</sup>H NMR analysis showed formation of a mixture of **2**, **5** and **C**.

<sup>1</sup>H NMR: δ 7.48 (m, *o*-C<sub>6</sub>H<sub>5</sub> {**5**}), 7.46 (m, *o*-C<sub>6</sub>H<sub>5</sub> {**C**}), 6.98 (m, *m*- and *p*-C<sub>6</sub>H<sub>5</sub> {**C**}), 6.95 (m, *m*- and *p*-C<sub>6</sub>H<sub>5</sub> {**5**}), 6.84 (s, C<sub>6</sub>H<sub>2</sub> {**2**}), 6.81 (s, C<sub>6</sub>H<sub>2</sub> {**C**}), 4.37 (overlapping sept, CH(CH<sub>3</sub>)<sub>2</sub>, {**5/C**}), 3.77 (m, THF-CH<sub>2</sub> {**2/5/C**}), 2.79 (m, α-C<sub>6</sub>H<sub>11</sub> {**5/C**}), 2.45 (s, 2,6-Me<sub>2</sub> {**2**}), 2.44 (s, 2,6-Me<sub>2</sub> {**C**}), 2.13 (s, 4-Me {**5/C**}), 1.84-1.12 (m, C<sub>6</sub>H<sub>11</sub> {**2/C**} and THF-CH<sub>2</sub> {**2/5/C**}), 1.44 (d, CH(CH<sub>3</sub>)<sub>2</sub> {**5**}), 1.41, 1.05 (d, CH(CH<sub>3</sub>)<sub>2</sub> {**C**}), 0.09 (s, HN{SiMe<sub>3</sub>})<sub>2</sub>. <sup>13</sup>C NMR: δ 174.0 (CN<sub>2</sub> {**2**}), 173.8 (CN<sub>2</sub> {**C**}), 157.9 (CN<sub>2</sub> {**5**}), 157.7 (CN<sub>2</sub> {**C**}), 136.5, 136.4, 134.7, 134.4, 132.3, 132.2, 128.9, 128.7, 123.1 (C<sub>6</sub>H<sub>5</sub> and C<sub>6</sub>H<sub>2</sub> {**2/5/C**}), 95.9 (C≡C {**5**}), 95.8 (C≡C {**C**}), 81.0 (C≡C {**C**}), 80.8 (C≡C {**5**}), 68.0 (THF-CH<sub>2</sub> {**2/5/C**}), 55.7, 55.1 (α-C<sub>6</sub>H<sub>11</sub> {**2/C**}), 48.9, 48.8 (CH(CH<sub>3</sub>)<sub>2</sub> {**5/C**}), 37.9, 37.8, 27.5, 27.3, 26.9, 26.7, 26.5, 26.4, 26.1, 25.6, 24.8 (C<sub>6</sub>H<sub>11</sub>, CH(CH<sub>3</sub>)<sub>2</sub> and THF-CH<sub>2</sub> {**2/5/C**}), 21.2, 20.8, 20.7 (2,6-Me<sub>2</sub> and 4-Me {**2/C**}), 2.7 (HN(SiMe<sub>3</sub>)<sub>2</sub>).

### Preparative scale

Phenylacetylene (0.065 mL, 0.62 mmol.) was added drop wise to a rapidly stirring solution of **1** (0.36 g, 0.62 mmol.) in toluene (10 mL). The solution was allowed to stir for 4 h at room temperature, followed by the addition of *N,N'*-diisopropylcarbodiimide (0.10 mL, 0.62 mmol.). The resulting solution was stirred for 24 h followed by removal of volatiles *in vacuo* to give a crude yellow solid. The addition of hexane (5 mL) to the solid, followed by storage at -30 °C for 24 h yielded clear colourless crystals, identified as **2**. Yield 0.11 g, 47 %. Additional crops of clear, yellow crystals were

obtained by further concentration of the solution and storage at  $-30\text{ }^{\circ}\text{C}$ , identified as **5**(THF) by  $^1\text{H}$  NMR spectroscopy. Yield 0.070 g, 36 %.

### General procedure for catalytic study

#### *NMR scale*

To a J. Young NMR tube charged with a mixture of phenyl acetylene (0.022 mL, 0.17 mmol.) and *N,N'*-diisopropylcarbodiimide (0.028 mL, 0.17 mmol) was added a solution of **1** in  $\text{C}_6\text{D}_6$  (0.5 mL of a 0.0034 M standard solution, 1.7  $\mu\text{mol}$ ). The NMR tube was heated to  $80\text{ }^{\circ}\text{C}$  for 24 h with regular monitoring of the progress of the catalysis using  $^1\text{H}$  NMR spectroscopy. Yields of the propargylamidine were determined using peaks corresponding to the THF from **1** as an internal standard.

#### *Preparative scale*

A solution of **1** (10 mg, 0.017 mmol.) in toluene (2.5 mL) was added to a stirring solution of phenyl acetylene (0.22 mL, 1.7 mmol.) and *N,N'*-diisopropylcarbodiimide (0.28 mL, 1.7 mmol.) in toluene (2.5 mL). The solution was heated to  $80\text{ }^{\circ}\text{C}$  and allowed to stir for 24 h, followed by removal of the volatiles *in vacuo* to give a yellow oil. Clear, yellow crystals of propargylamidine were obtained by recrystallisation from hexane. Yield 0.28 g, 73 %.

### References

1. Day, B. M.; Knowelden, W.; Coles, M. P., *Dalton Trans.* **2012**, 41, 10930-10933.



**Figure S1**  $^1\text{H}$  NMR Spectrum of  $\text{Mg}(\text{mesC}\{\text{NCy}\}_2)(\text{N}\{\text{SiMe}_3\}_2)(\text{THF})$  (**1**) ( $\text{C}_6\text{D}_6$ , 300 MHz).

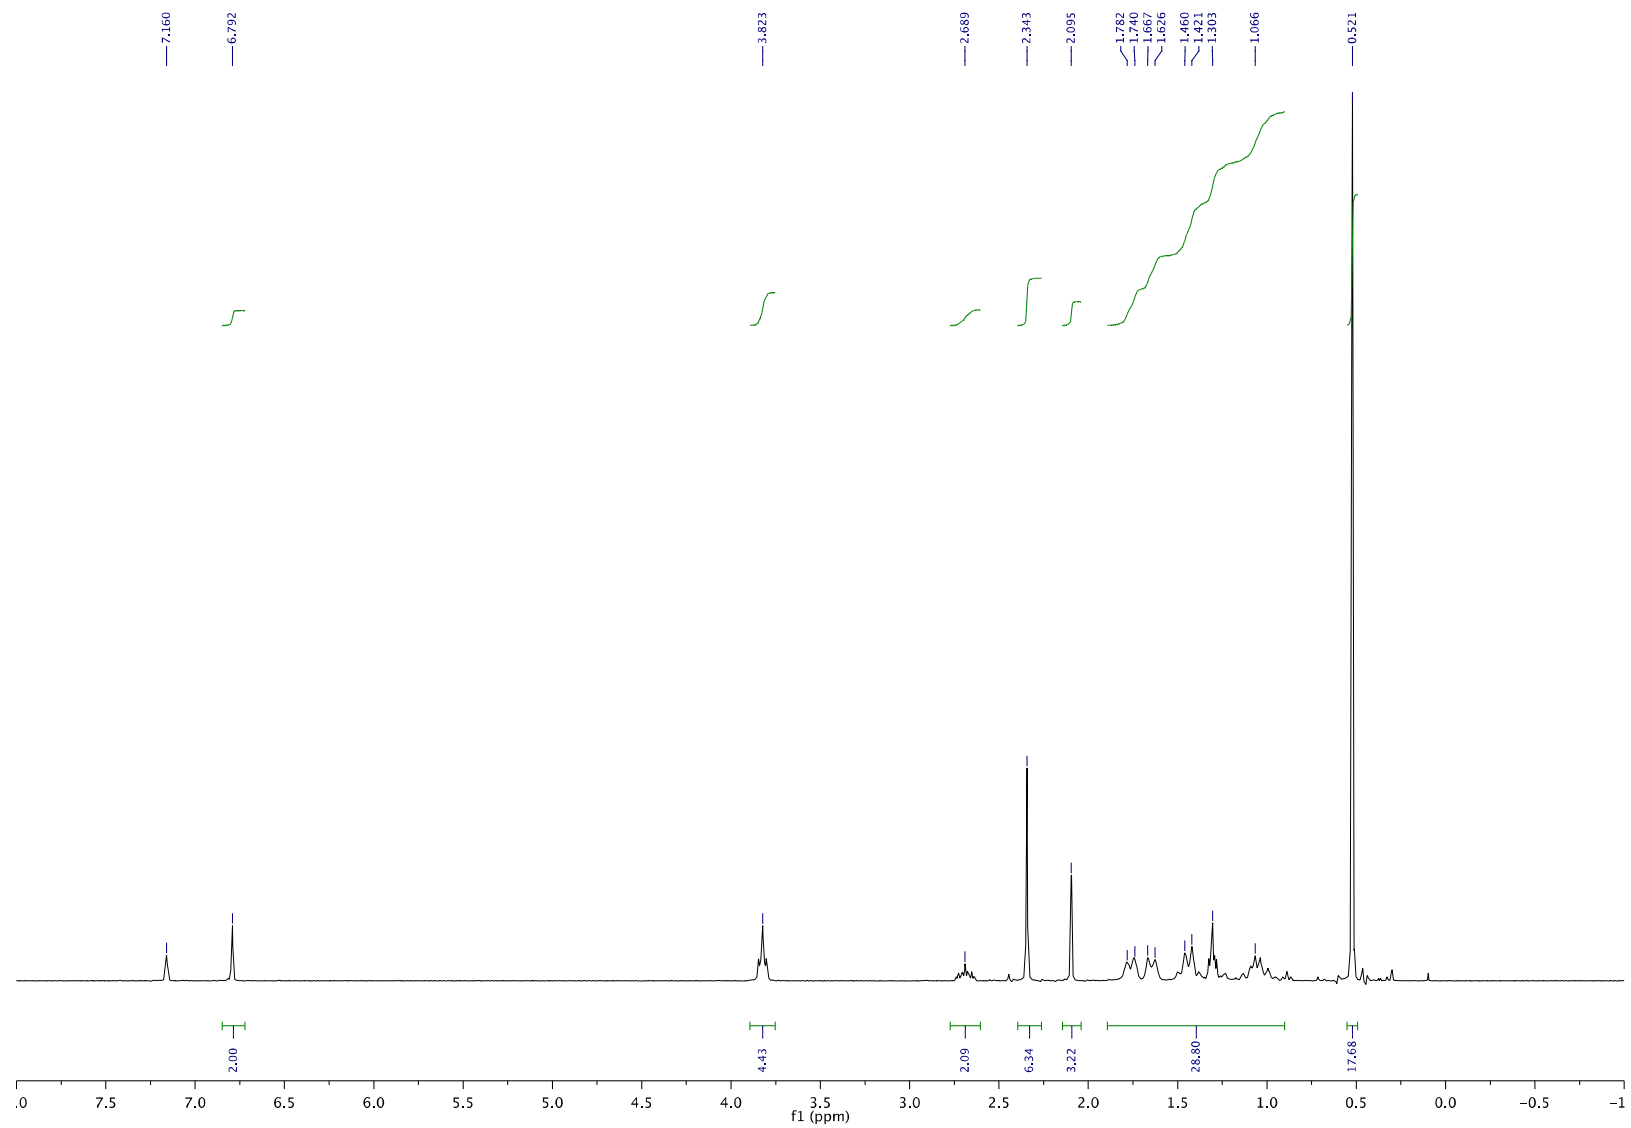

**Figure S2**  $^1\text{H}$  NMR Spectrum of  $\text{Mg}(\text{mesC}\{\text{NCy}\}_2)_2(\text{THF})$  (**2**) ( $\text{C}_6\text{D}_6$ , 300 MHz).

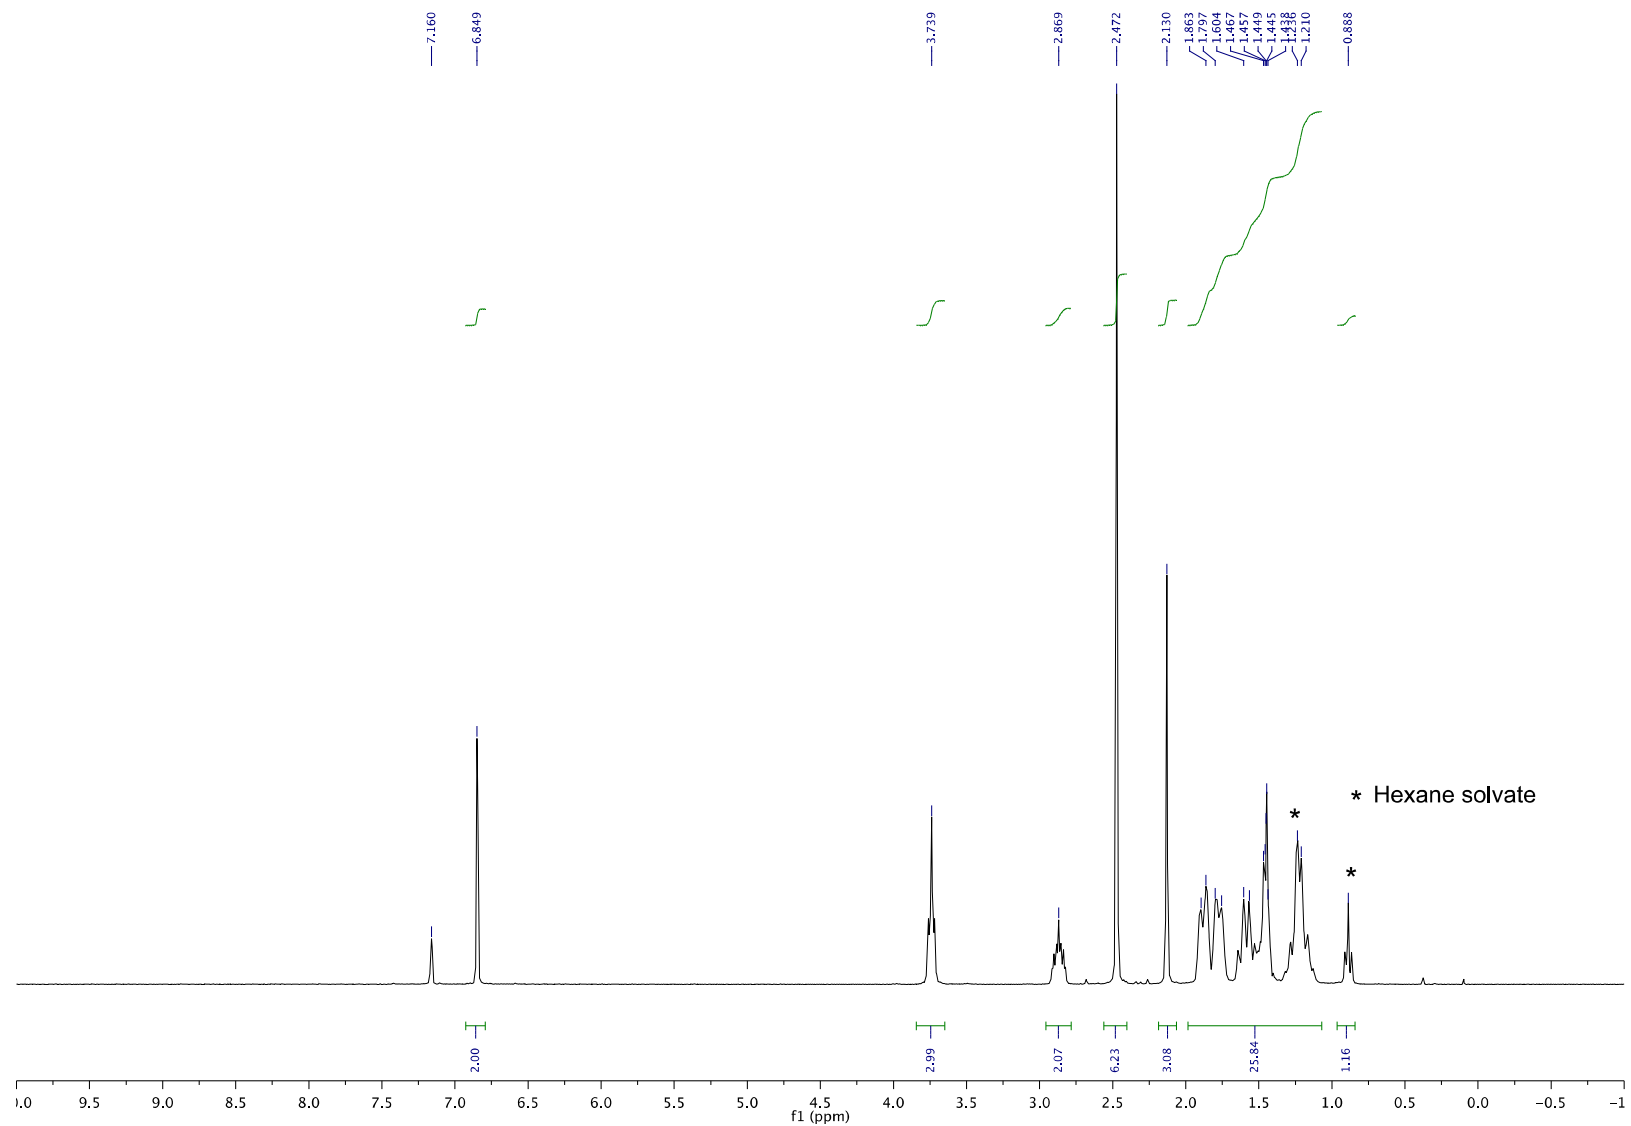

**Figure S3**  $^{13}\text{C}\{^1\text{H}\}$  NMR Spectrum of  $\text{Mg}(\text{mesC}\{\text{NCy}\}_2)_2(\text{THF})$  (**2**) ( $\text{C}_6\text{D}_6$ , 75 MHz).

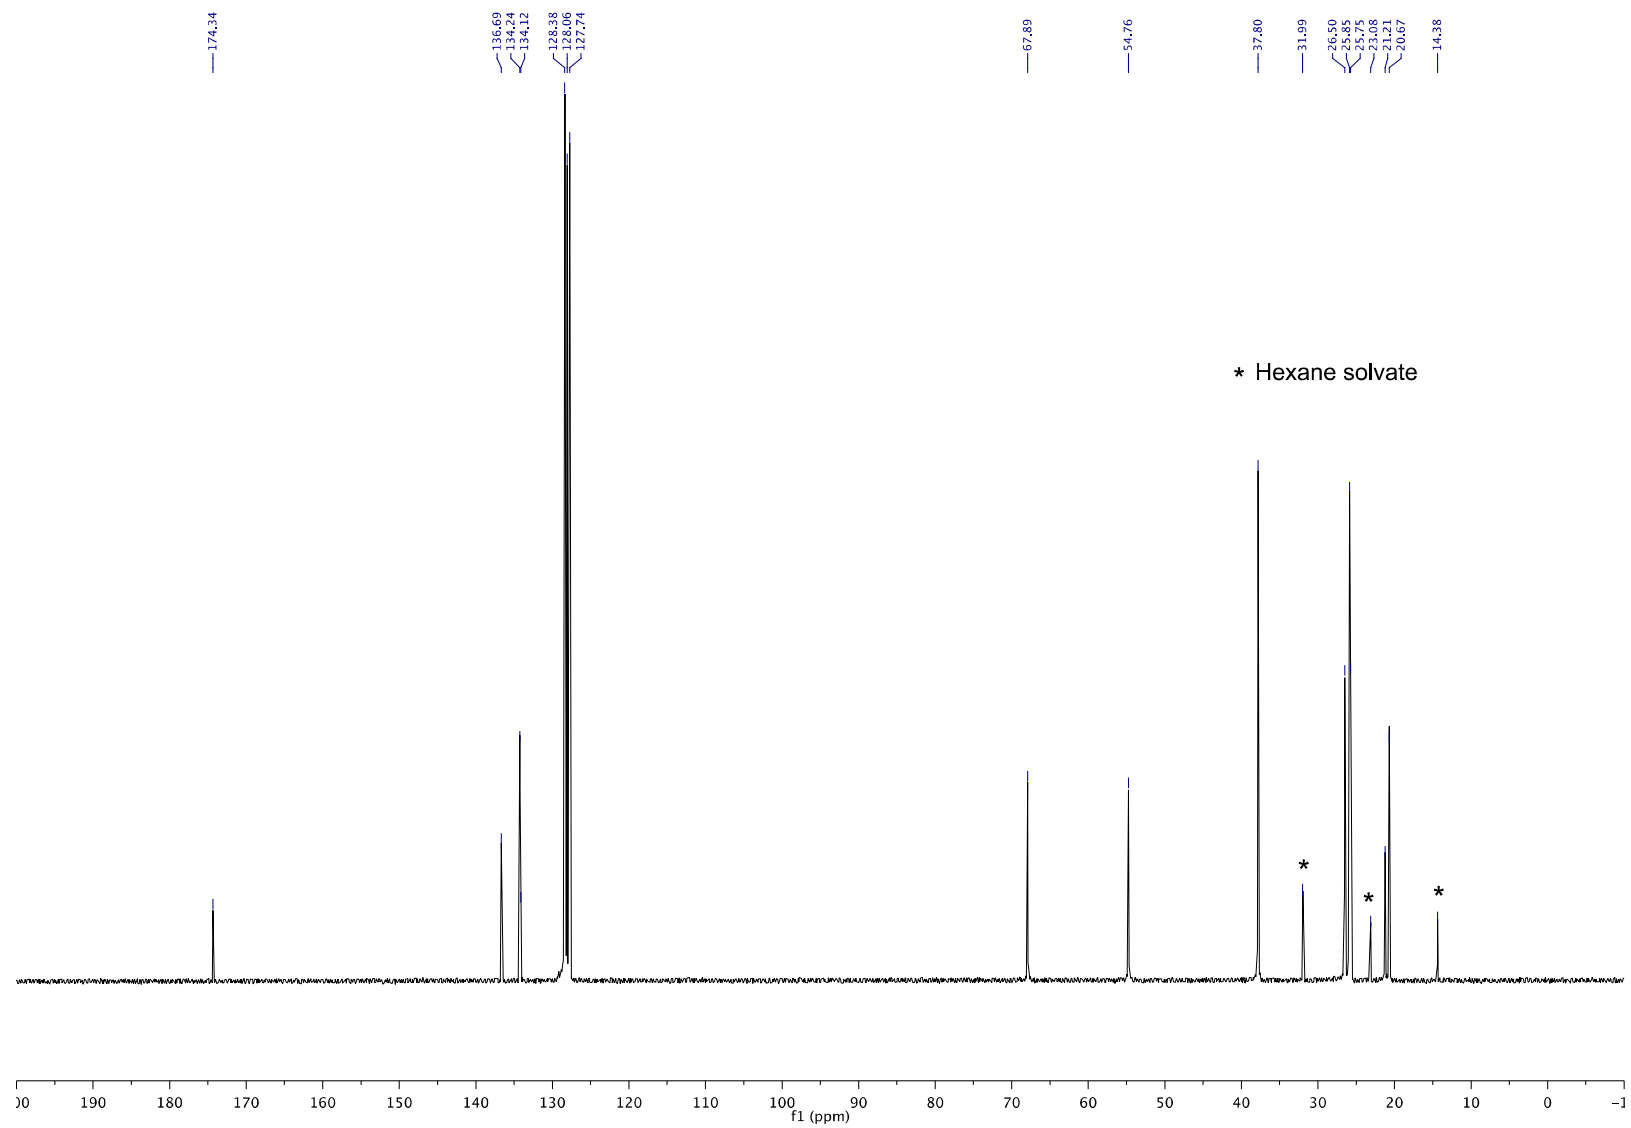

**Figure S4**  $^1\text{H}$  NMR Spectrum of  $\text{Mg}(\{\text{Me}_3\text{Si}\}_2\text{NC}\{\text{Ni-Pr}\}_2)_2(\text{THF})$  (**3**) ( $\text{C}_6\text{D}_6$ , 300 MHz).

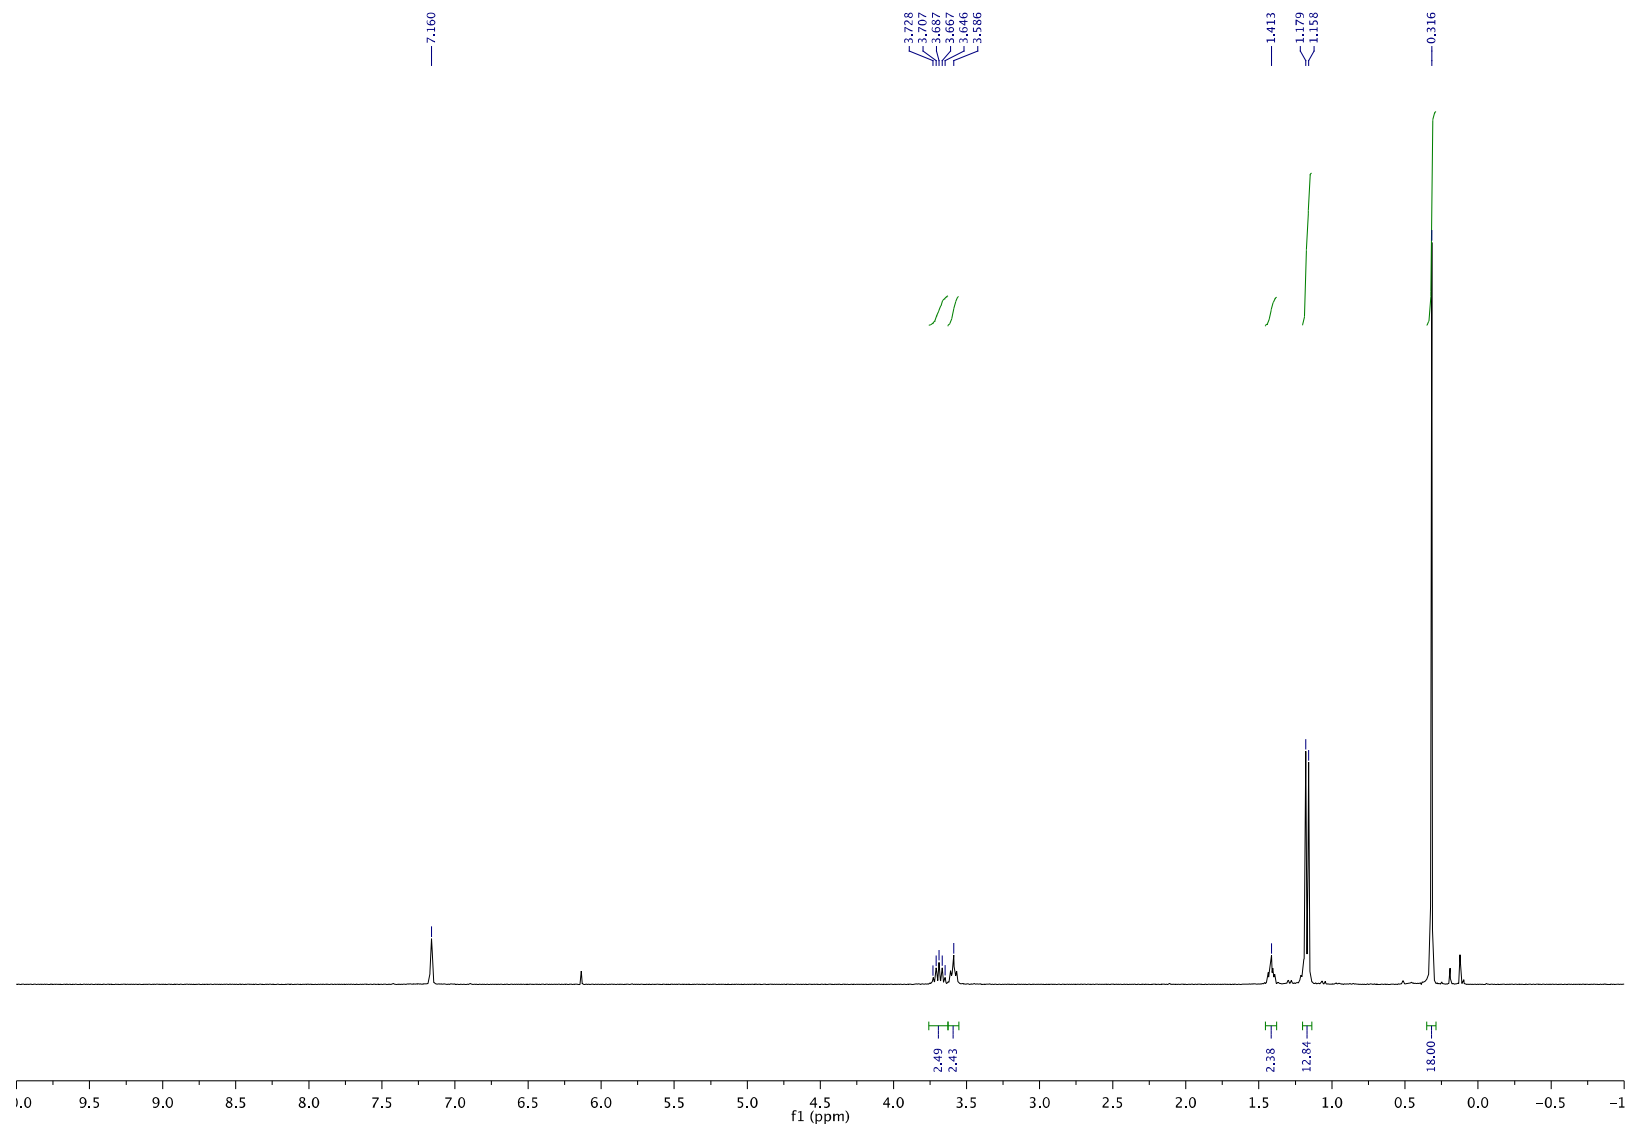

**Figure S5**  $^{13}\text{C}\{^1\text{H}\}$  NMR Spectrum of  $\text{Mg}(\{\text{Me}_3\text{Si}\}_2\text{NC}\{\text{Ni-Pr}\}_2)_2(\text{THF})$  (**3**) ( $\text{C}_6\text{D}_6$ , 75 MHz).

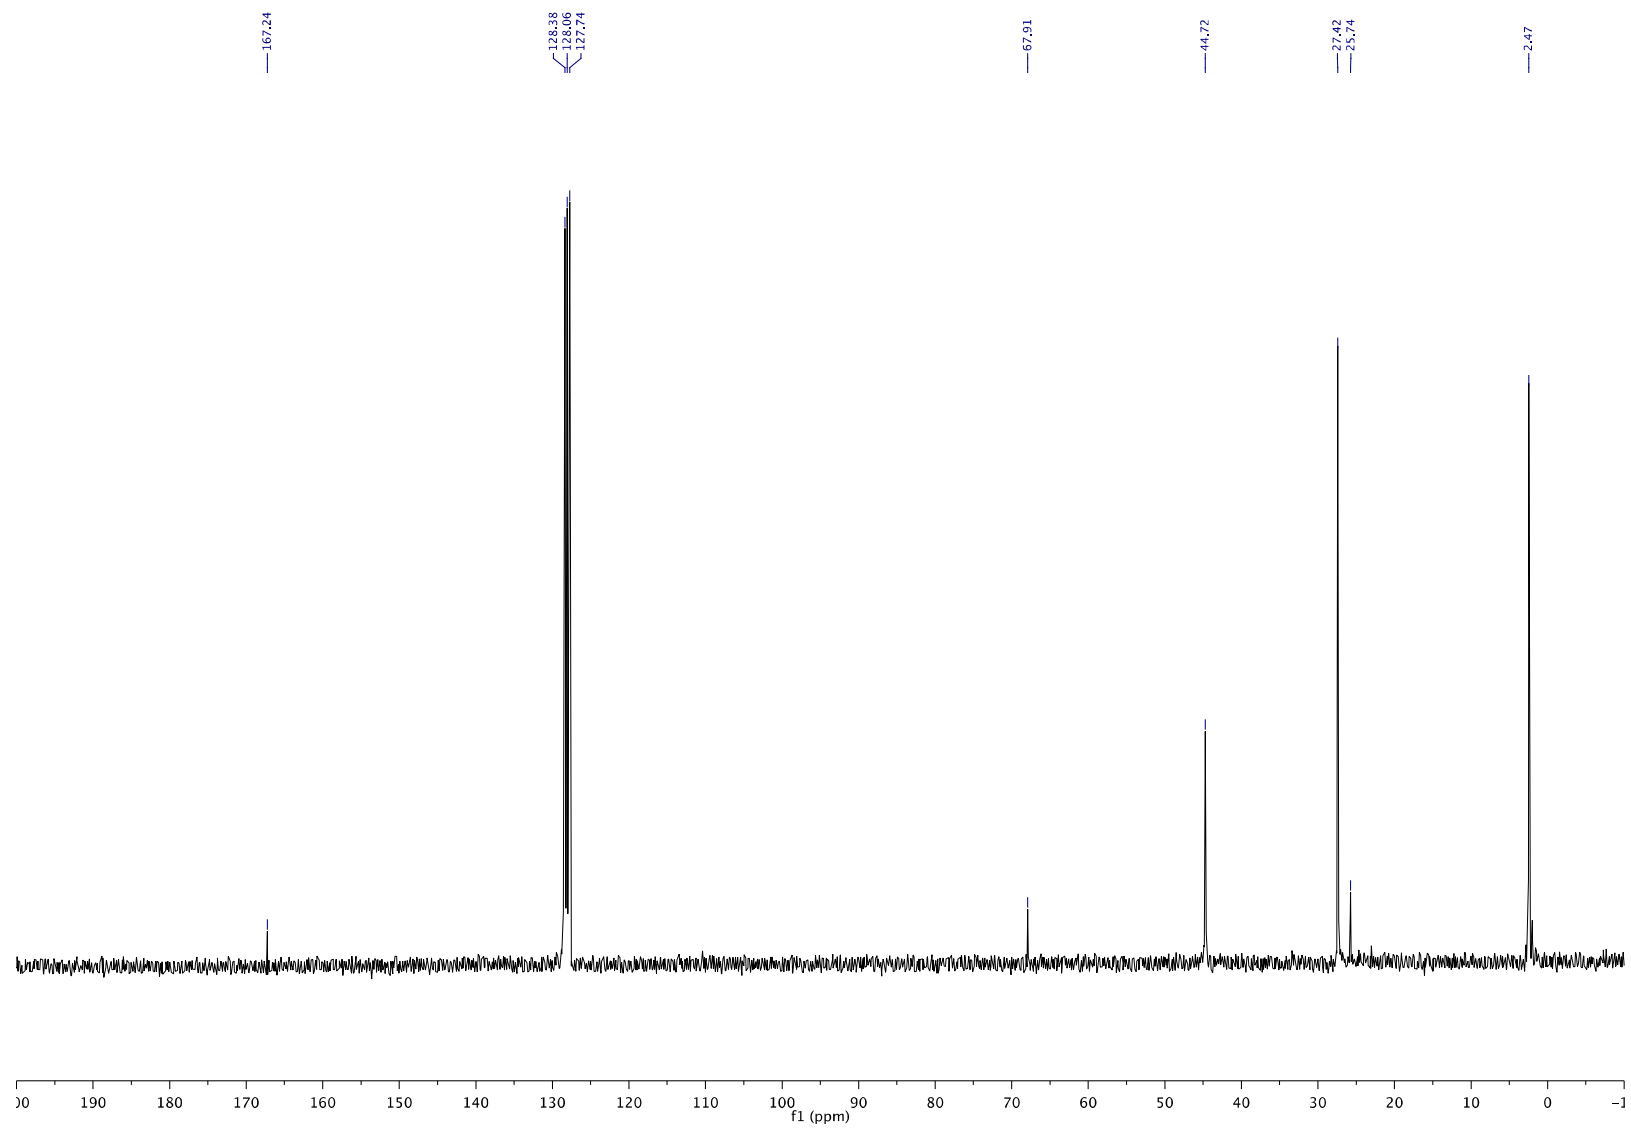

**Figure S6**  $^1\text{H}$  NMR Spectrum of  $\text{Mg}(\text{C}\equiv\text{CPh})_2(\text{THF})_4$  (**4**) ( $\text{C}_6\text{D}_6$ , 300 MHz).

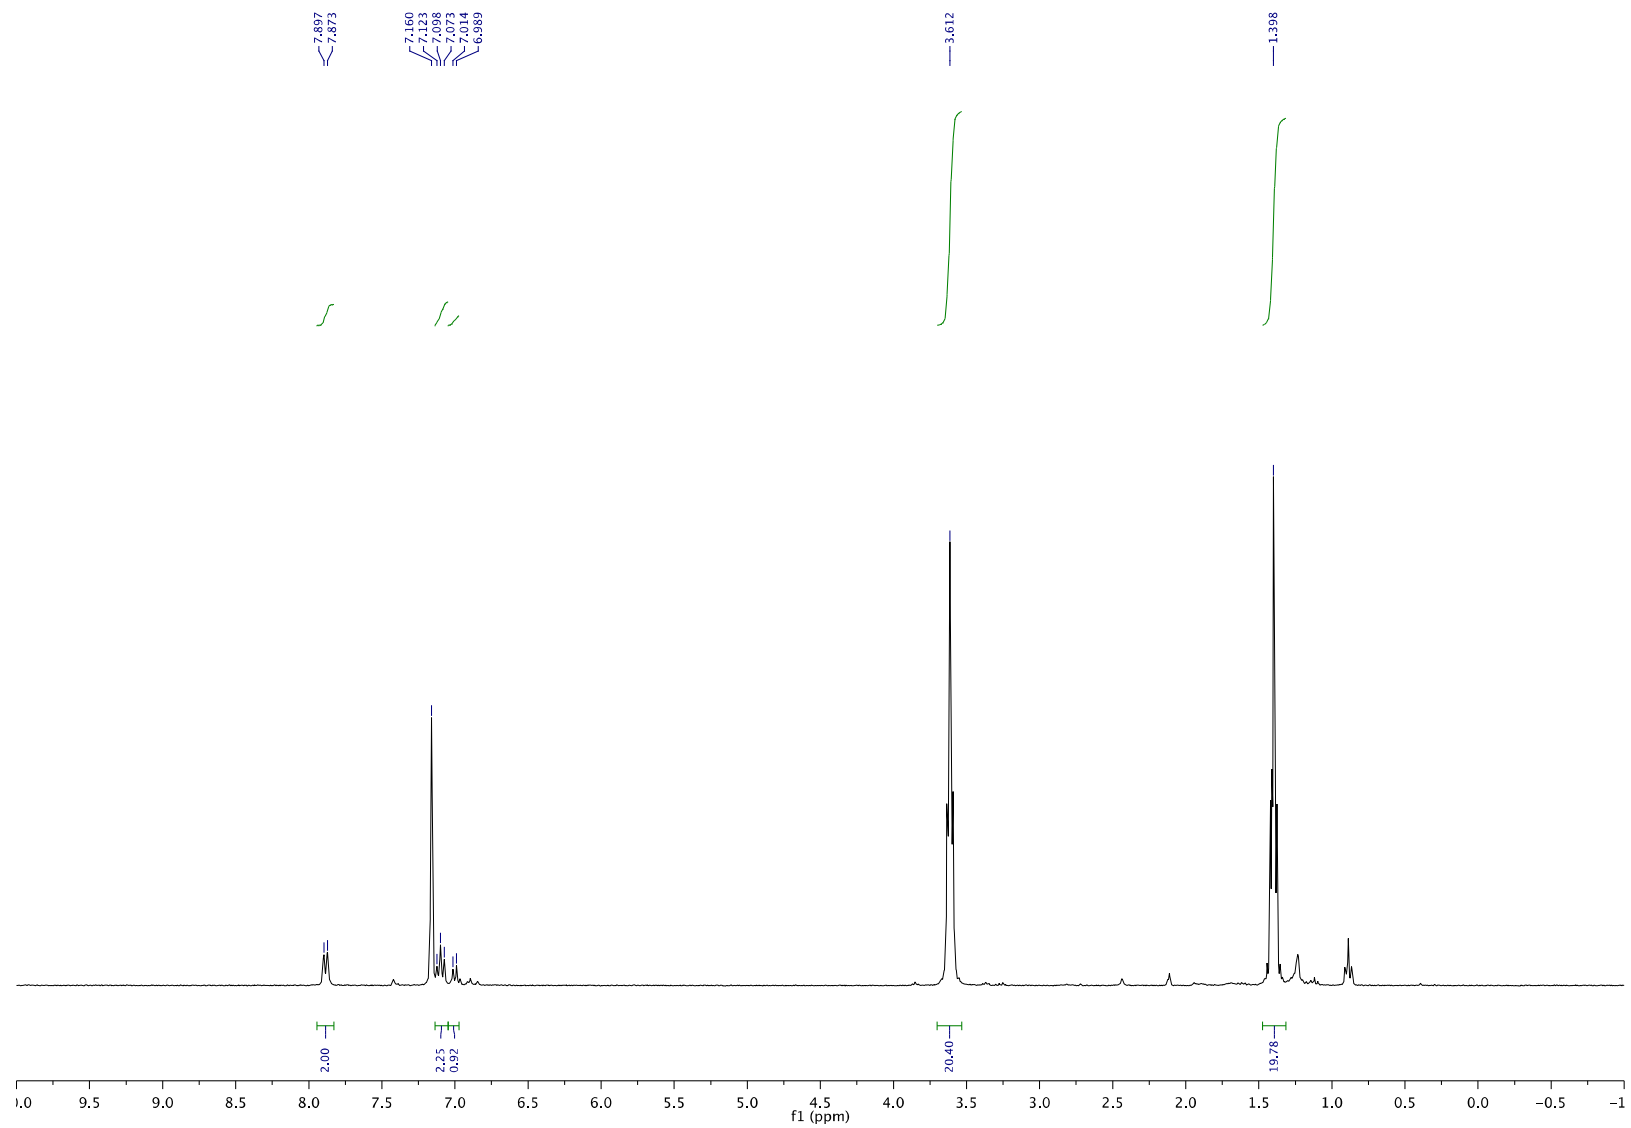

**Figure S7**  $^{13}\text{C}\{^1\text{H}\}$  NMR Spectrum of  $\text{Mg}(\text{C}\equiv\text{CPh})_2(\text{THF})_4$  (**4**) ( $\text{C}_6\text{D}_6$ , 75 MHz).

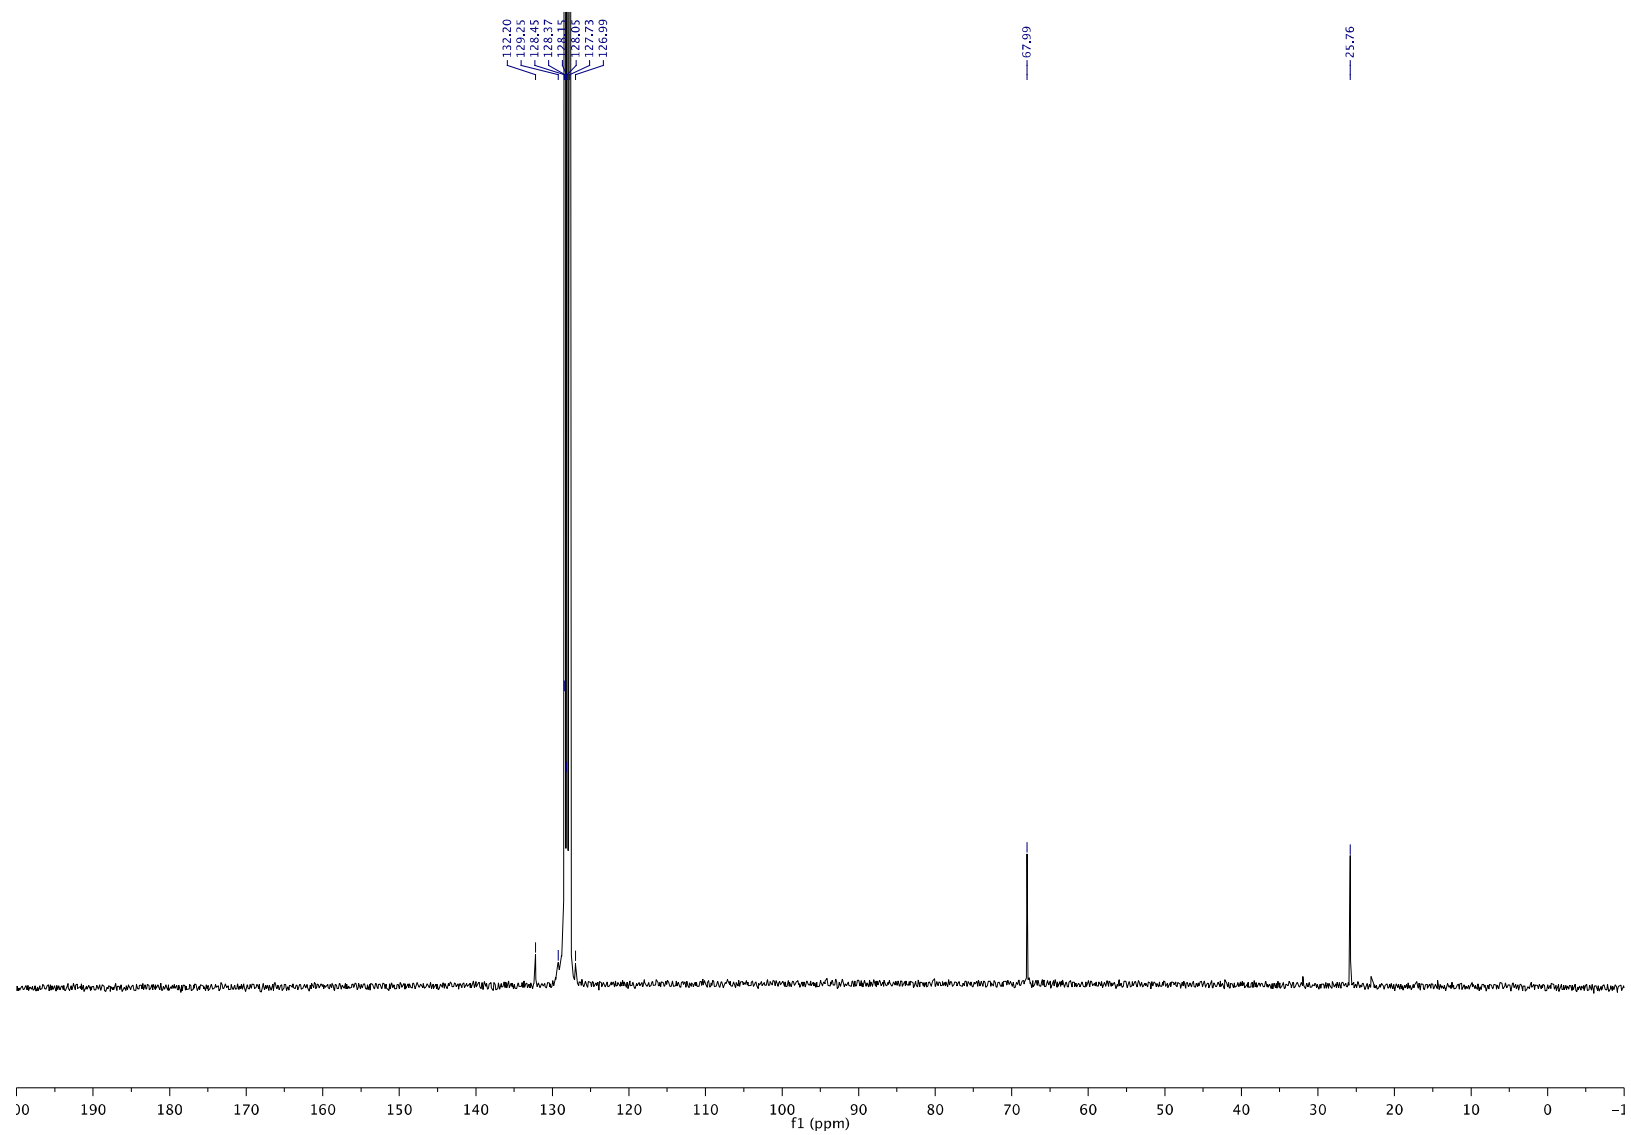

**Figure S8**  $^1\text{H}$  NMR Spectrum of  $\text{Mg}(\text{PhC}\equiv\text{CC}\{\text{Ni-Pr}\}_2)_2(\text{THF})_2$  (**5**) ( $\text{C}_6\text{D}_6$ , 300 MHz).

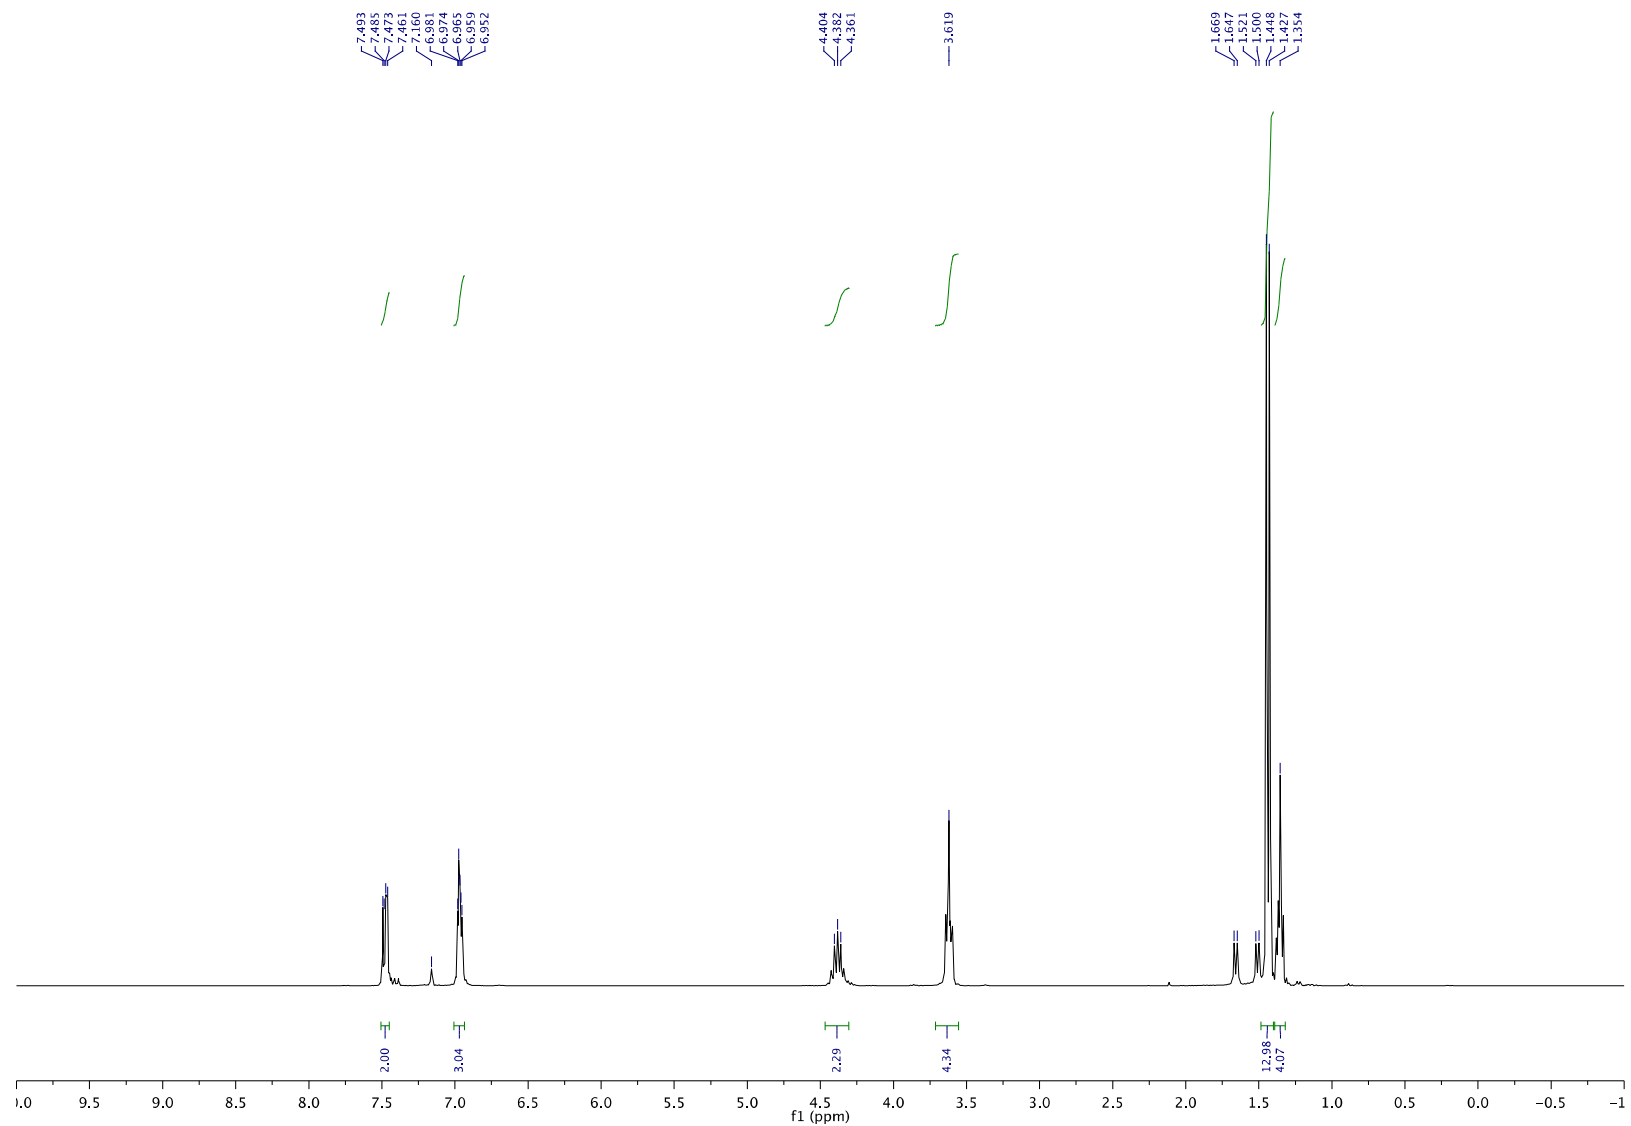



**Figure S9**  $^{13}\text{C}\{^1\text{H}\}$  NMR Spectrum of  $\text{Mg}(\text{PhC}\equiv\text{CC}\{\text{Ni-Pr}\}_2)_2(\text{THF})_2$  (**5**) ( $\text{C}_6\text{D}_6$ , 75 MHz).

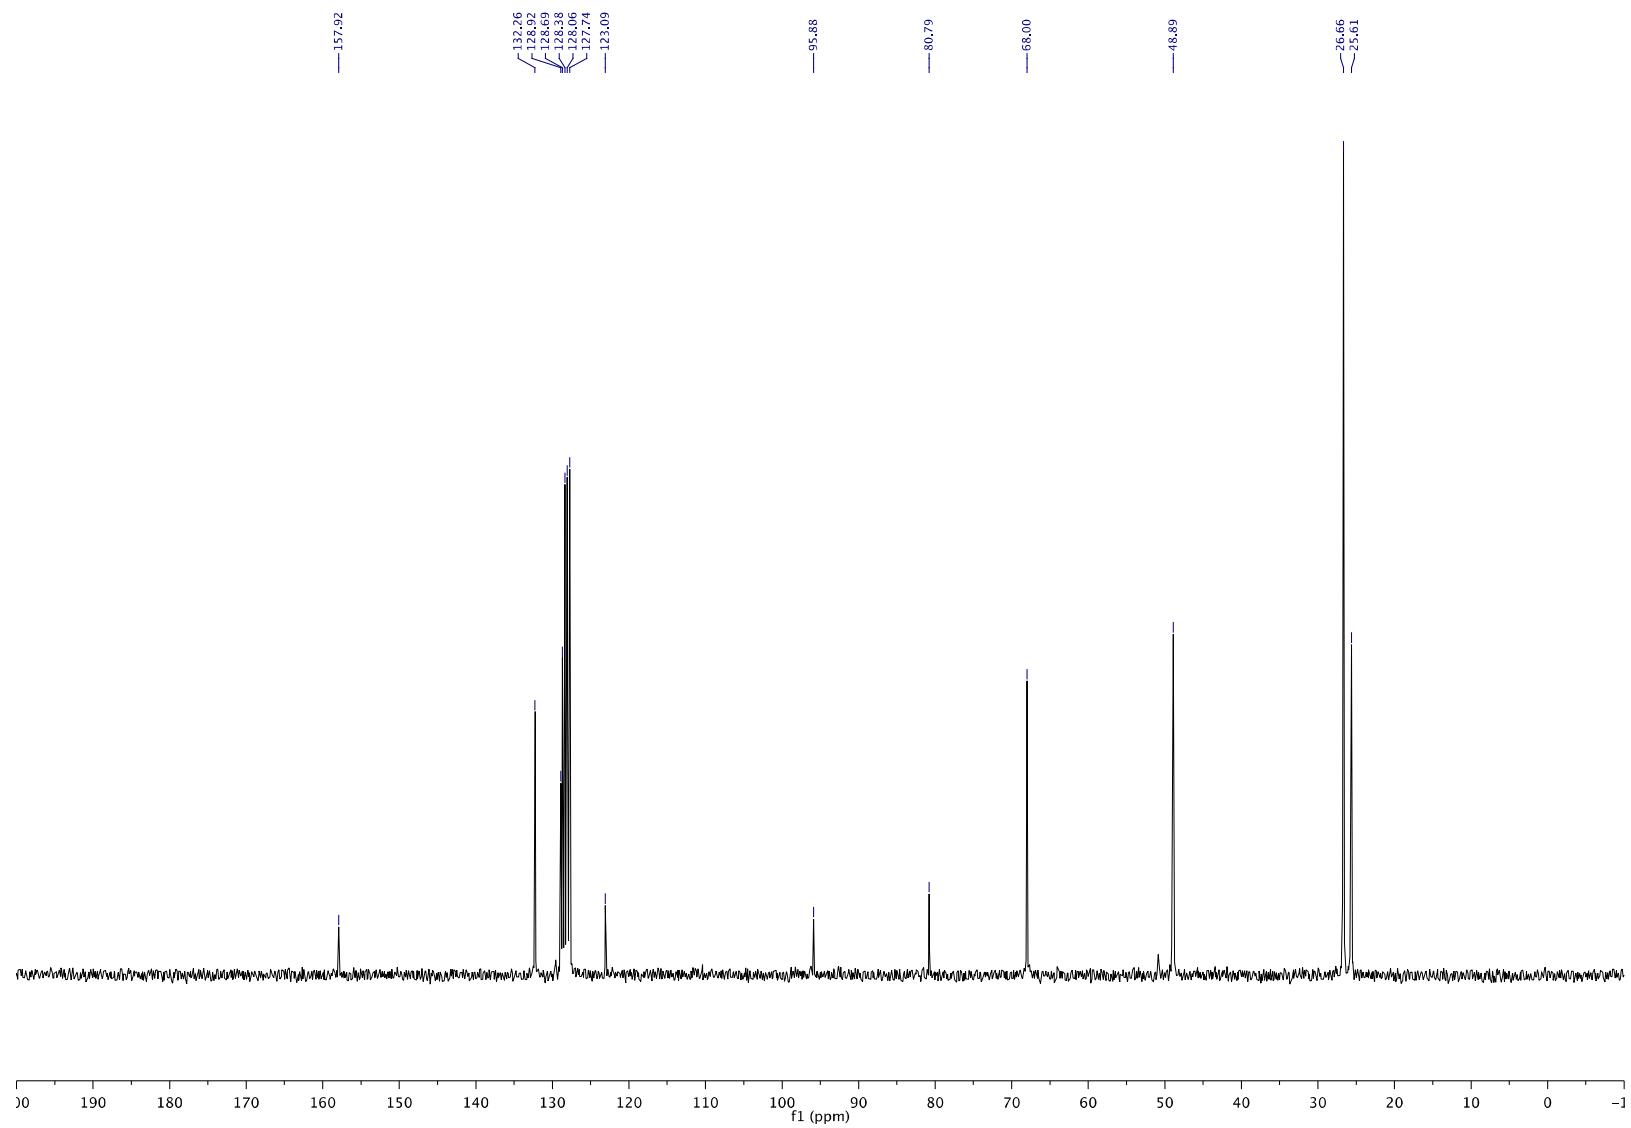

**Figure S10**  $^1\text{H}$  NMR Spectrum of  $\text{Mg}(\text{PhC}\equiv\text{CC}\{\text{Ni-Pr}\}_2)\text{Br}(\text{Et}_2\text{O})$  (**6**) ( $\text{C}_6\text{D}_6$ , 300 MHz).

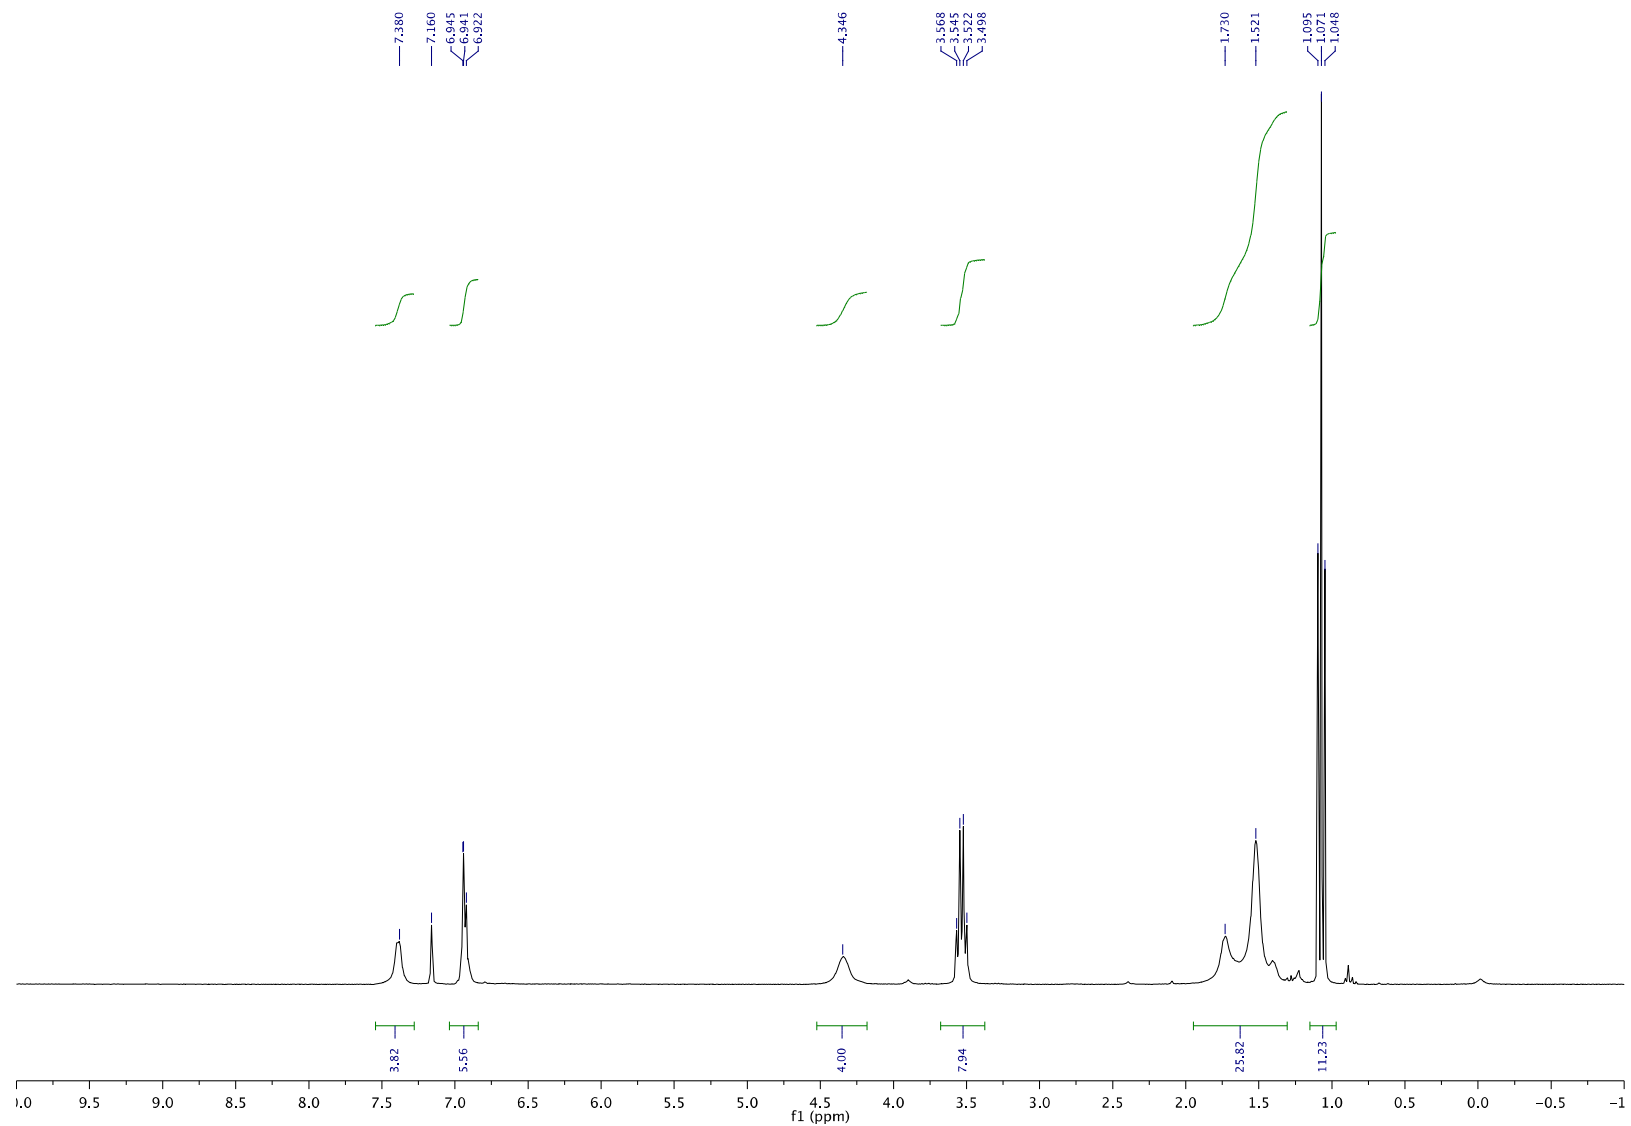

**Figure S11**  $^{13}\text{C}\{^1\text{H}\}$  NMR Spectrum of  $\text{Mg}(\text{PhC}\equiv\text{CC}\{\text{Ni-Pr}\}_2)\text{Br}(\text{Et}_2\text{O})$  (**6**) ( $\text{C}_6\text{D}_6$ , 75 MHz).

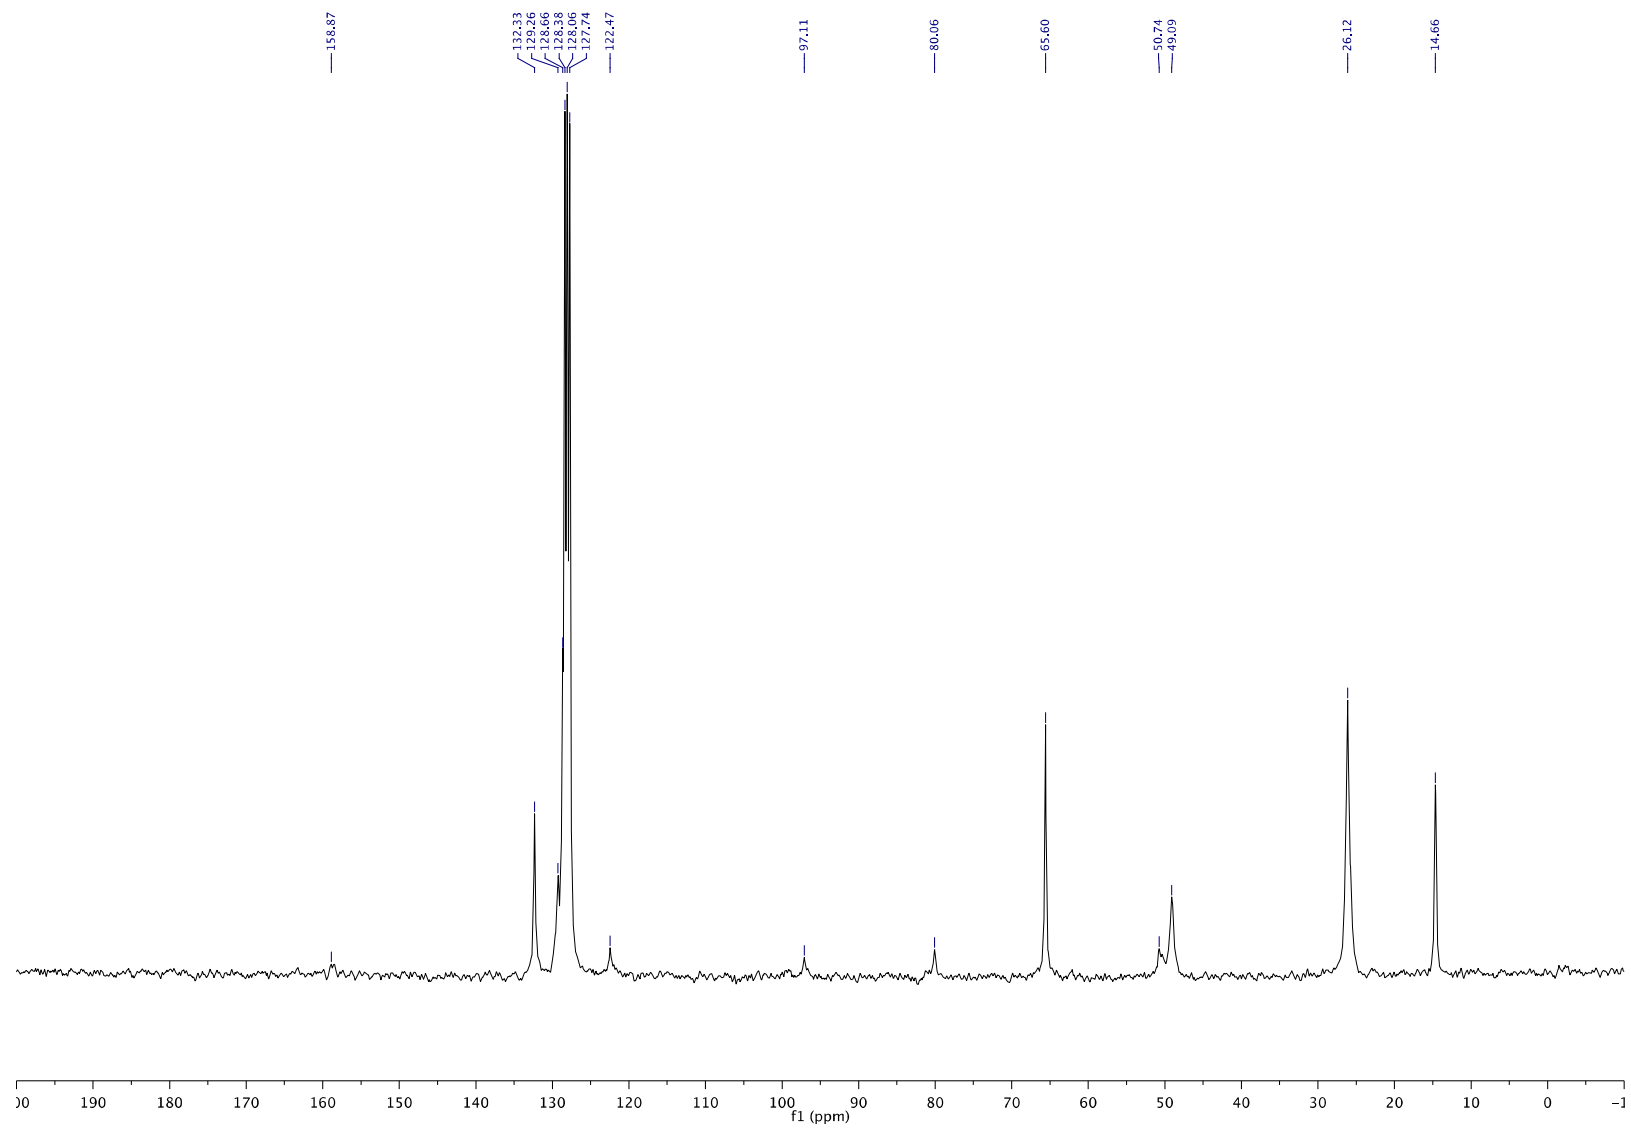

**Figure S12**  $^1\text{H}$  NMR Spectrum of the NMR scale reaction of **1** with one equivalent  $\text{PhC}\equiv\text{CH}$  ( $\text{C}_6\text{D}_6$ , 300 MHz), affording  $\text{Mg}(\text{mesC}\{\text{NCy}\}_2)(\text{C}\equiv\text{CPh})(\text{THF})$  (**A**).

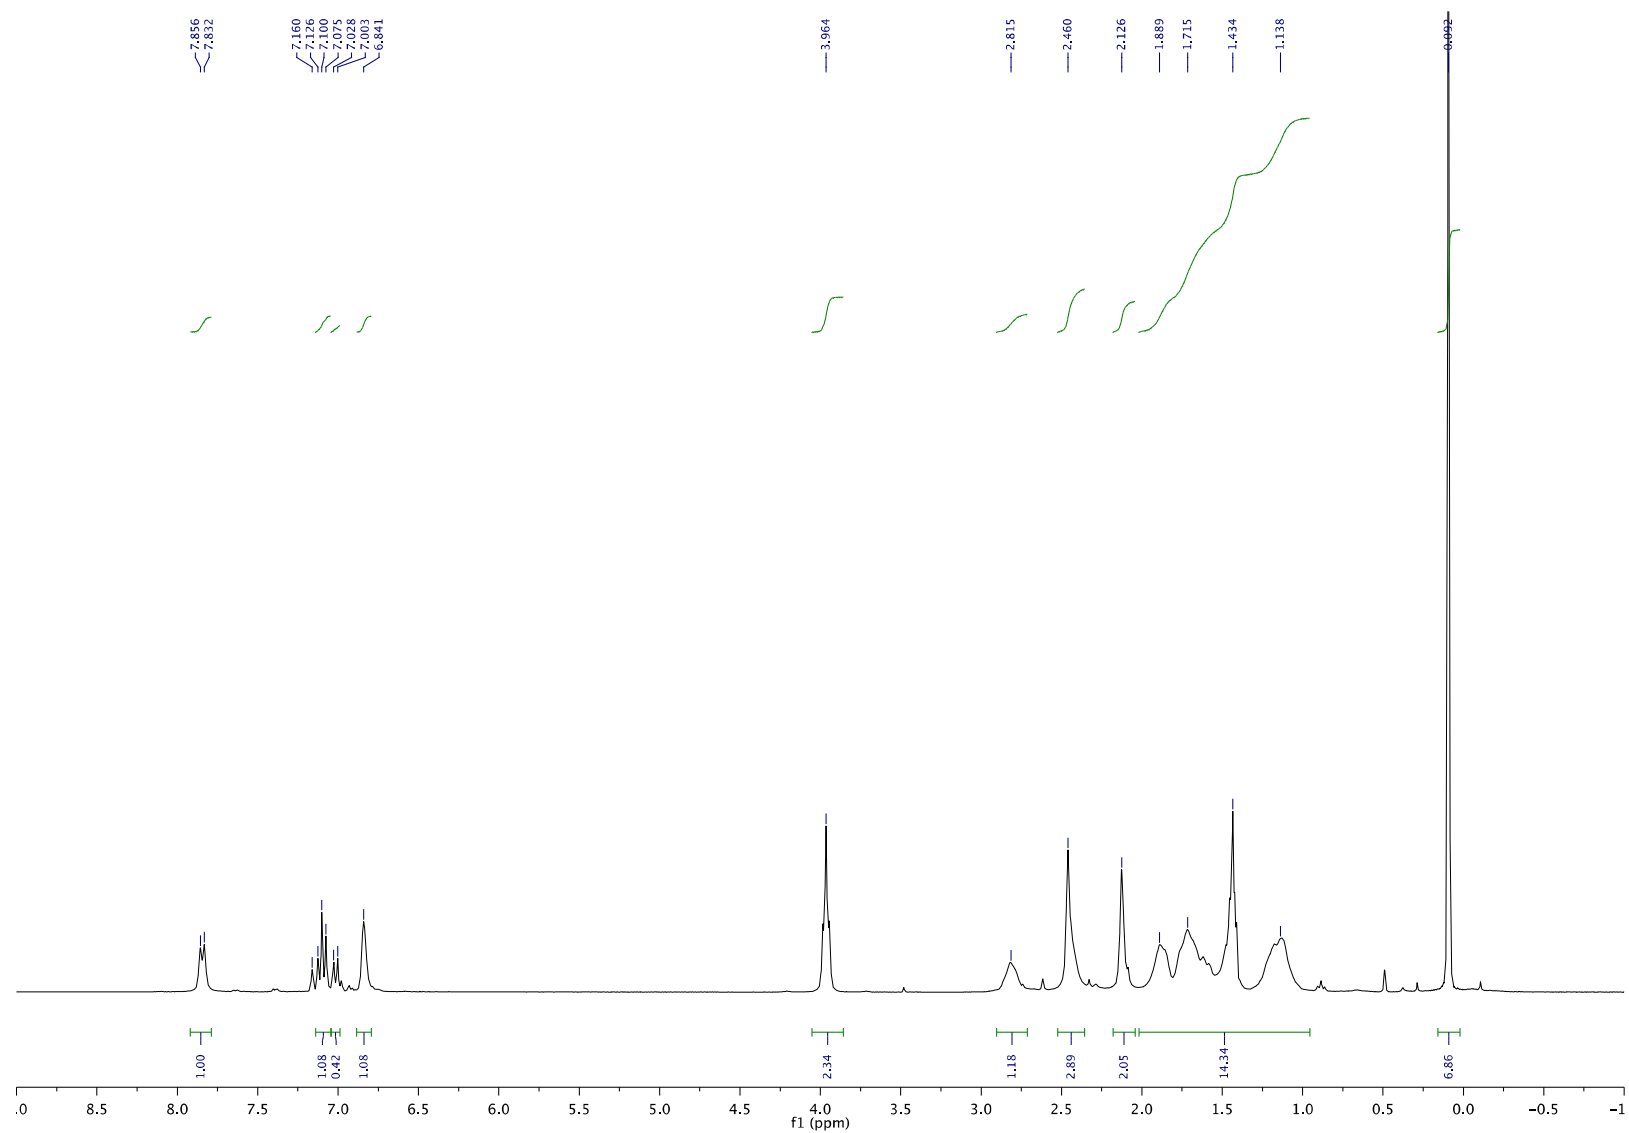

**Figure S13**  $^{13}\text{C}\{^1\text{H}\}$  NMR Spectrum of the NMR scale reaction of **1** with one equivalent  $\text{PhC}\equiv\text{CH}$  ( $\text{C}_6\text{D}_6$ , 75 MHz), affording  $\text{Mg}(\text{mesC}\{\text{NCy}\}_2)(\text{C}\equiv\text{CPh})(\text{THF})$  (**A**).

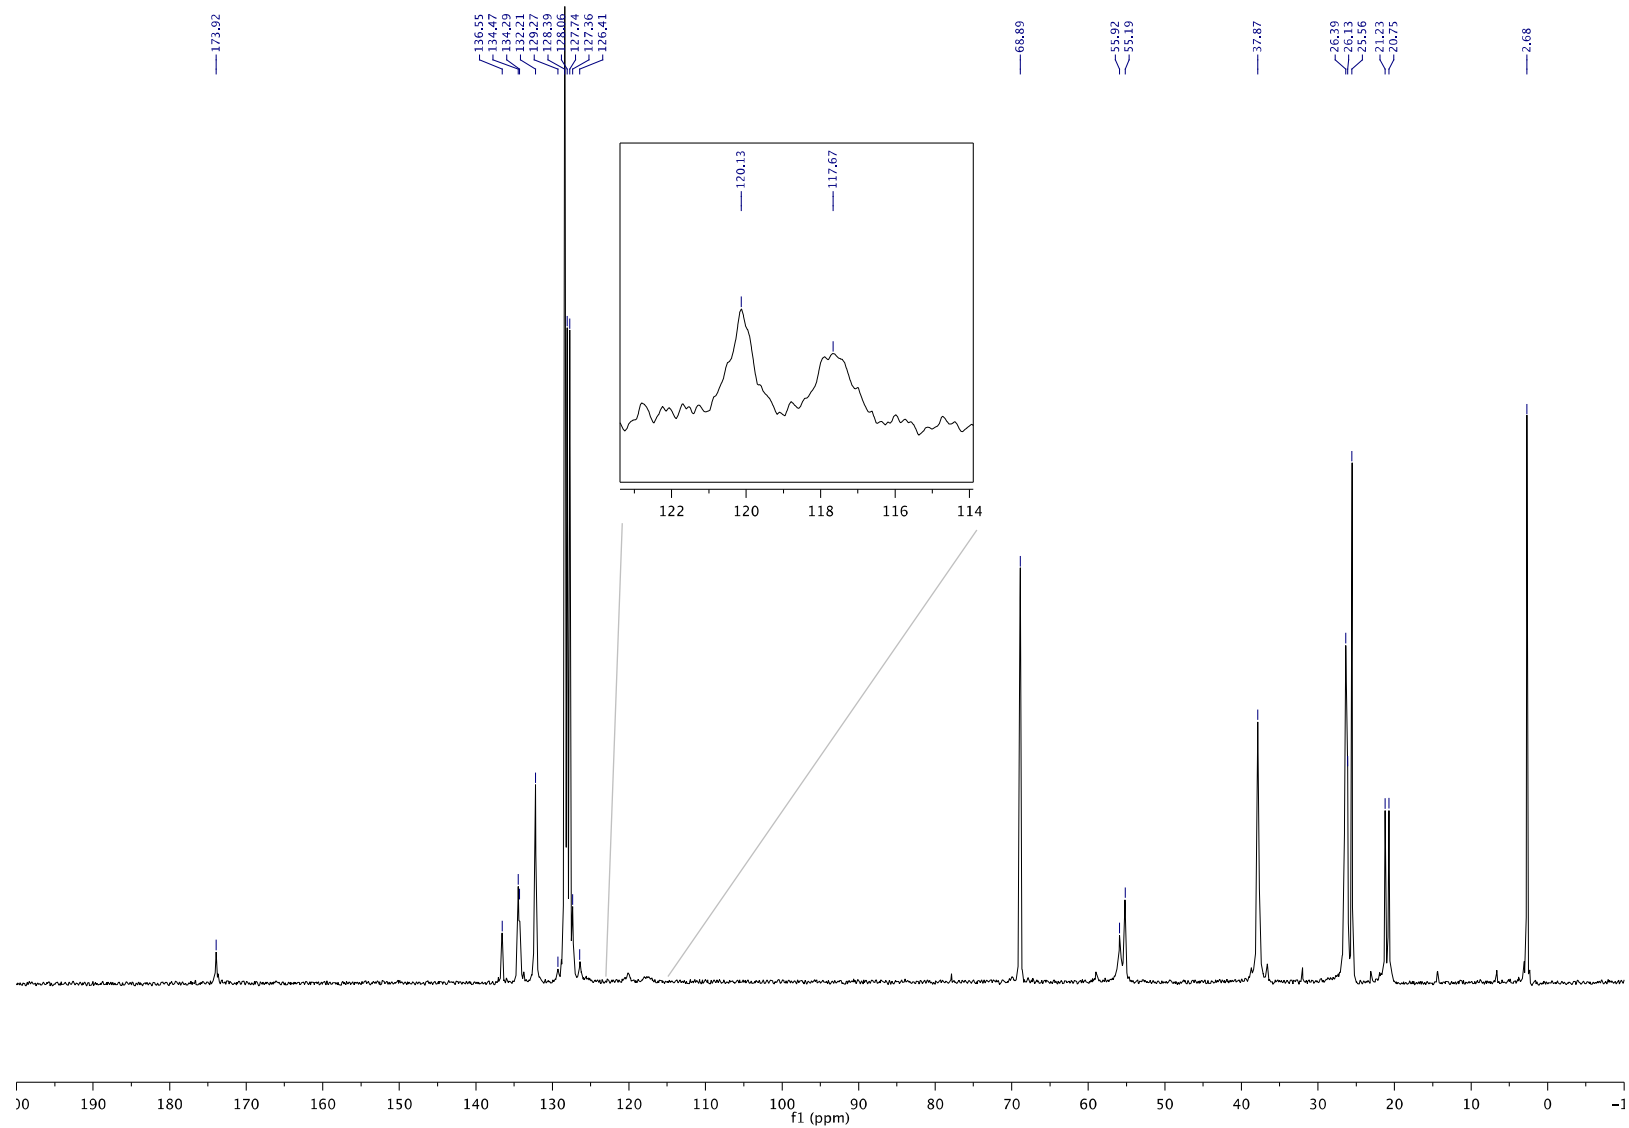

**Figure S14**  $^1\text{H}$  NMR Spectrum of the NMR scale reaction of **1** with one equivalent  $i\text{Pr-N}=\text{C}=\text{Ni-Pr}$  ( $\text{C}_6\text{D}_6$ , 300 MHz). Peaks corresponding to  $\text{Mg}(\text{mesC}\{\text{NCy}\}_2)_2(\text{THF})$  (**2**) and  $\text{Mg}(\{\text{Me}_3\text{Si}\}_2\text{NC}\{\text{Ni-Pr}\}_2)_2(\text{THF})$  (**3**) identified.

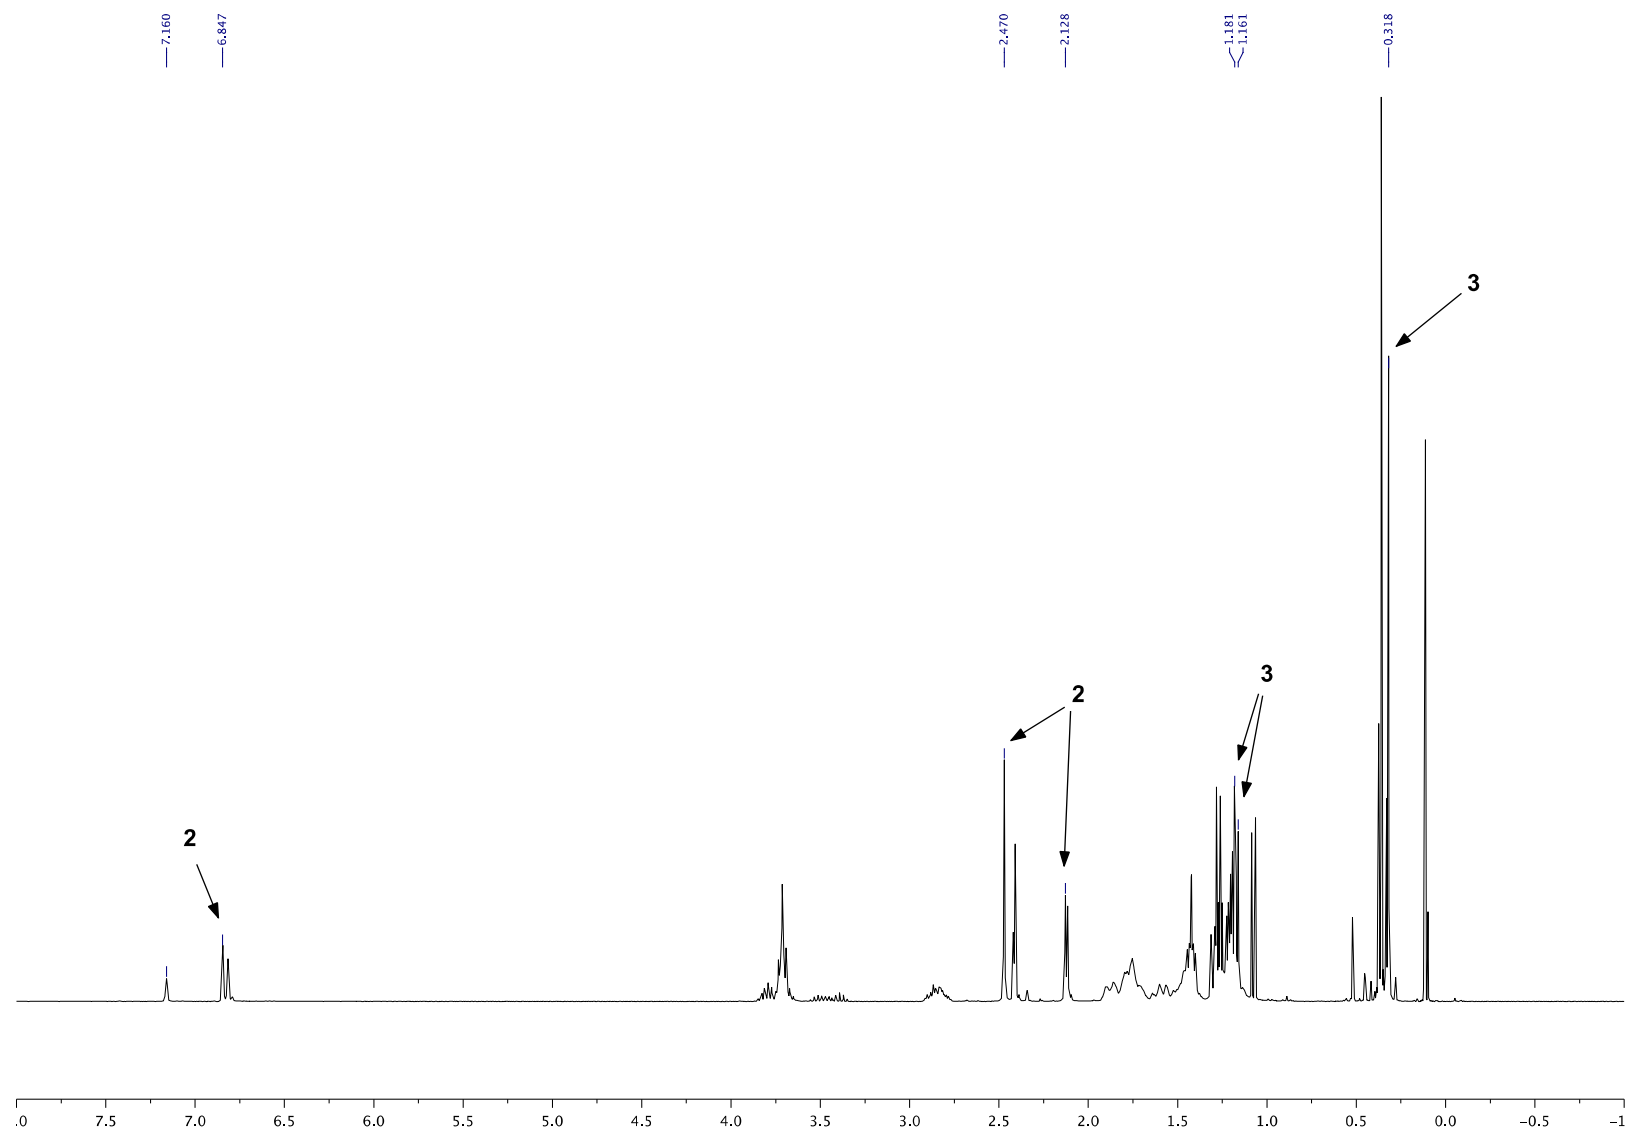

**Figure S15**  $^{13}\text{C}\{^1\text{H}\}$  NMR Spectrum of the NMR scale reaction of **1** with one equivalent  $i\text{Pr-N}=\text{C}=\text{Ni-Pr}$  ( $\text{C}_6\text{D}_6$ , 75 MHz). Low-field peaks corresponding to  $\text{Mg}(\text{mesC}\{\text{NCy}\}_2)_2(\text{THF})$  (**2**),  $\text{Mg}(\{\text{Me}_3\text{Si}\}_2\text{NC}\{\text{Ni-Pr}\}_2)(\text{THF})$  (**3**) and  $\text{Mg}(\text{mesC}\{\text{NCy}\}_2)(\{\text{Me}_3\text{Si}\}_2\text{NC}\{\text{Ni-Pr}\}_2)(\text{THF})_n$  (**B**) shown (expansion).

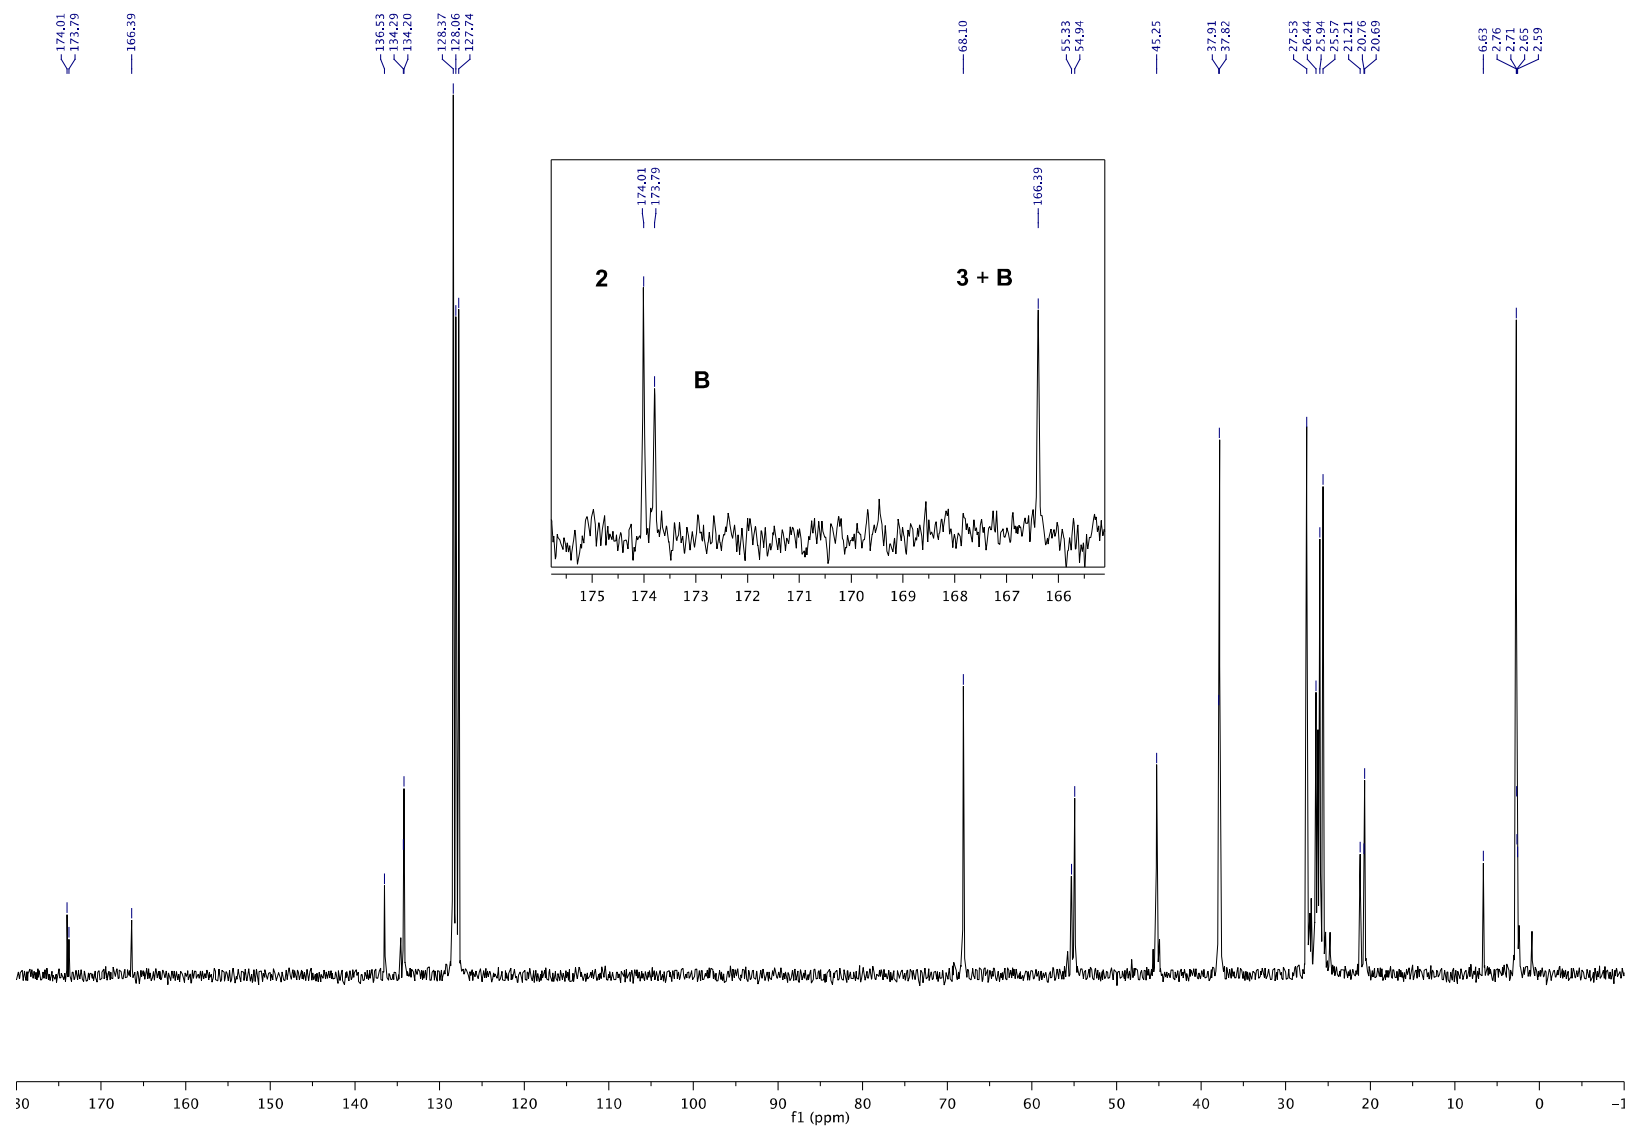

**Figure S16**  $^1\text{H}$  NMR Spectrum of the NMR scale reaction of *in situ* generated **A** with one equivalent *i*Pr-N=C=Ni-Pr ( $\text{C}_6\text{D}_6$ , 300 MHz). Peaks corresponding to  $\text{Mg}(\text{mesC}\{\text{NCy}\}_2)_2(\text{THF})$  (**2**) and  $\text{Mg}(\text{PhC}\equiv\text{CC}\{\text{Ni-Pr}\}_2)(\text{THF})_2$  (**5**) identified.

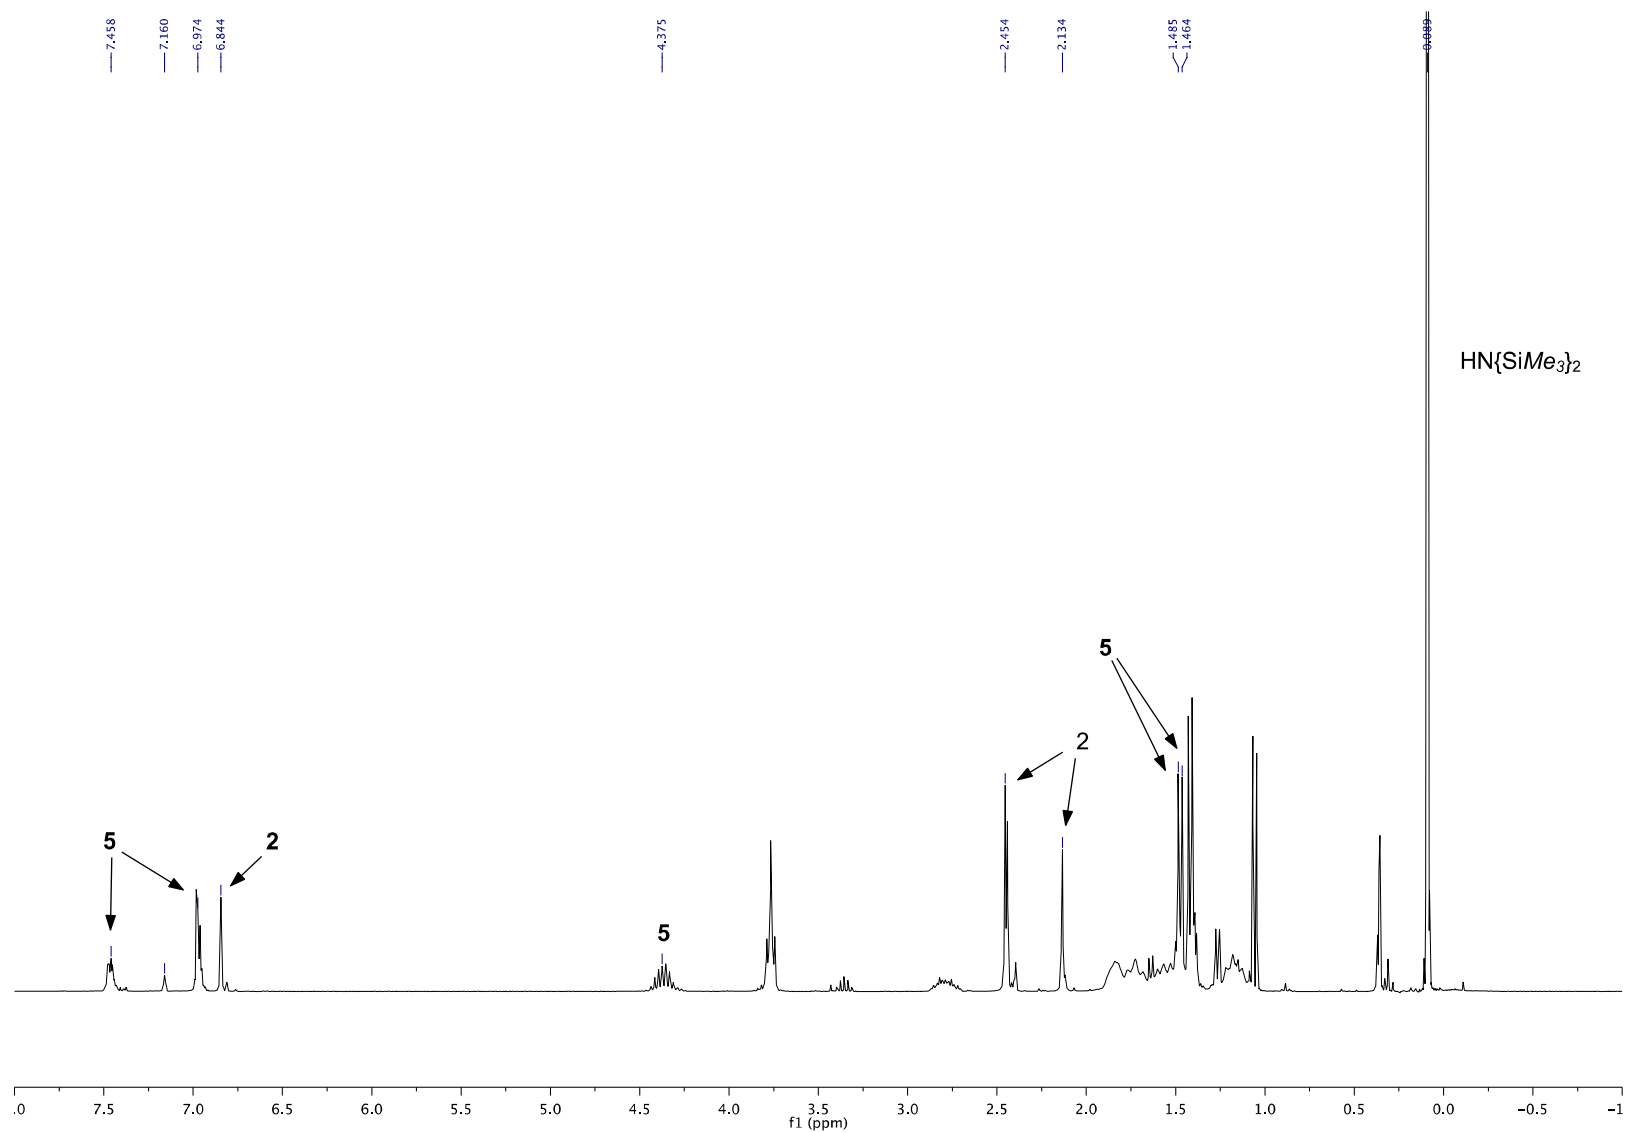



**Figure S17**  $^{13}\text{C}\{^1\text{H}\}$  NMR Spectrum of the NMR scale reaction of of *in situ* generated **A** with one equivalent *i*Pr-N=C=Ni-Pr ( $\text{C}_6\text{D}_6$ , 75 MHz). Low-field peaks corresponding to  $\text{Mg}(\text{mesC}\{\text{NCy}\}_2)_2(\text{THF})$  (**2**),  $\text{Mg}(\text{PhC}\equiv\text{CC}\{\text{Ni-Pr}\}_2)_2(\text{THF})_2$  (**5**) and  $\text{Mg}(\text{mesC}\{\text{NCy}\}_2)(\text{PhC}\equiv\text{CC}\{\text{Ni-Pr}\}_2)(\text{THF})_n$  (**C**) and acetylenic peaks for **5** and **C** shown (expansions).

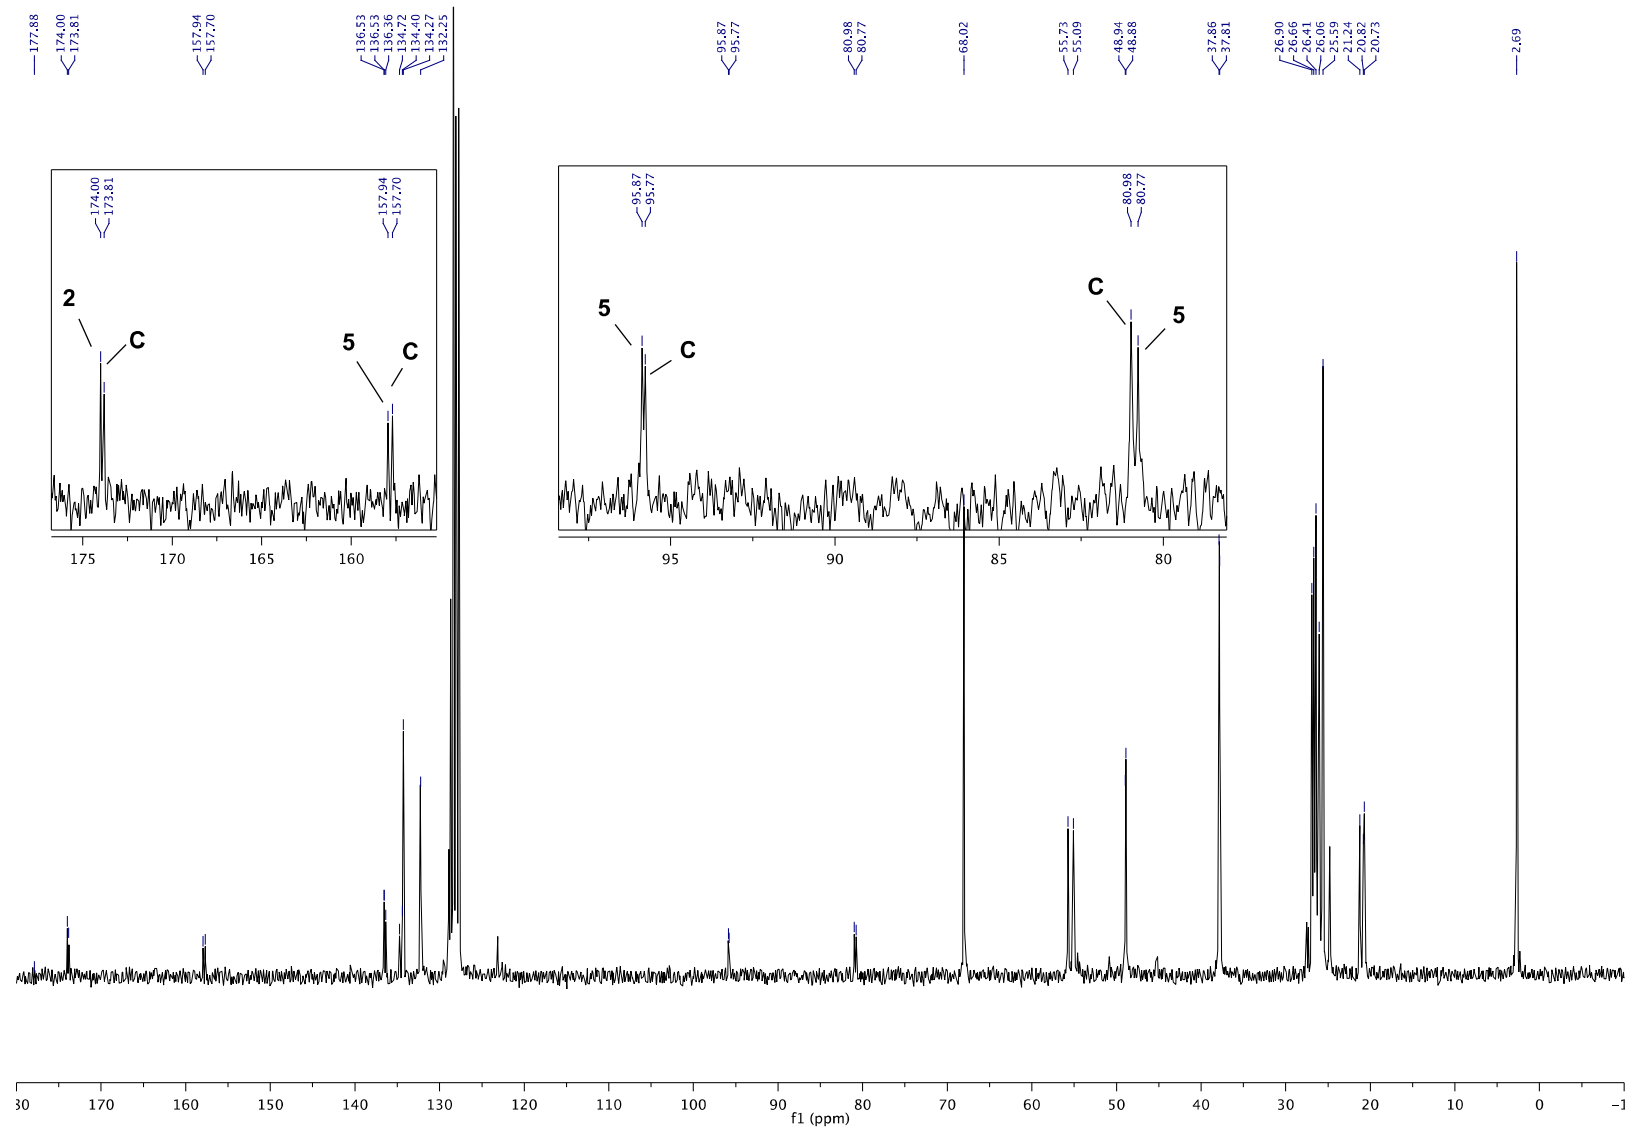

**Figure S18** Stacked  $^1\text{H}$  NMR spectra of a representative catalytic coupling of  $\text{PhC}\equiv\text{CH}$  and  $i\text{-PrN}=\text{C}=\text{Ni-Pr}$  using **1** at Room Temperature ( $\text{C}_6\text{D}_6$ , 300 MHz).

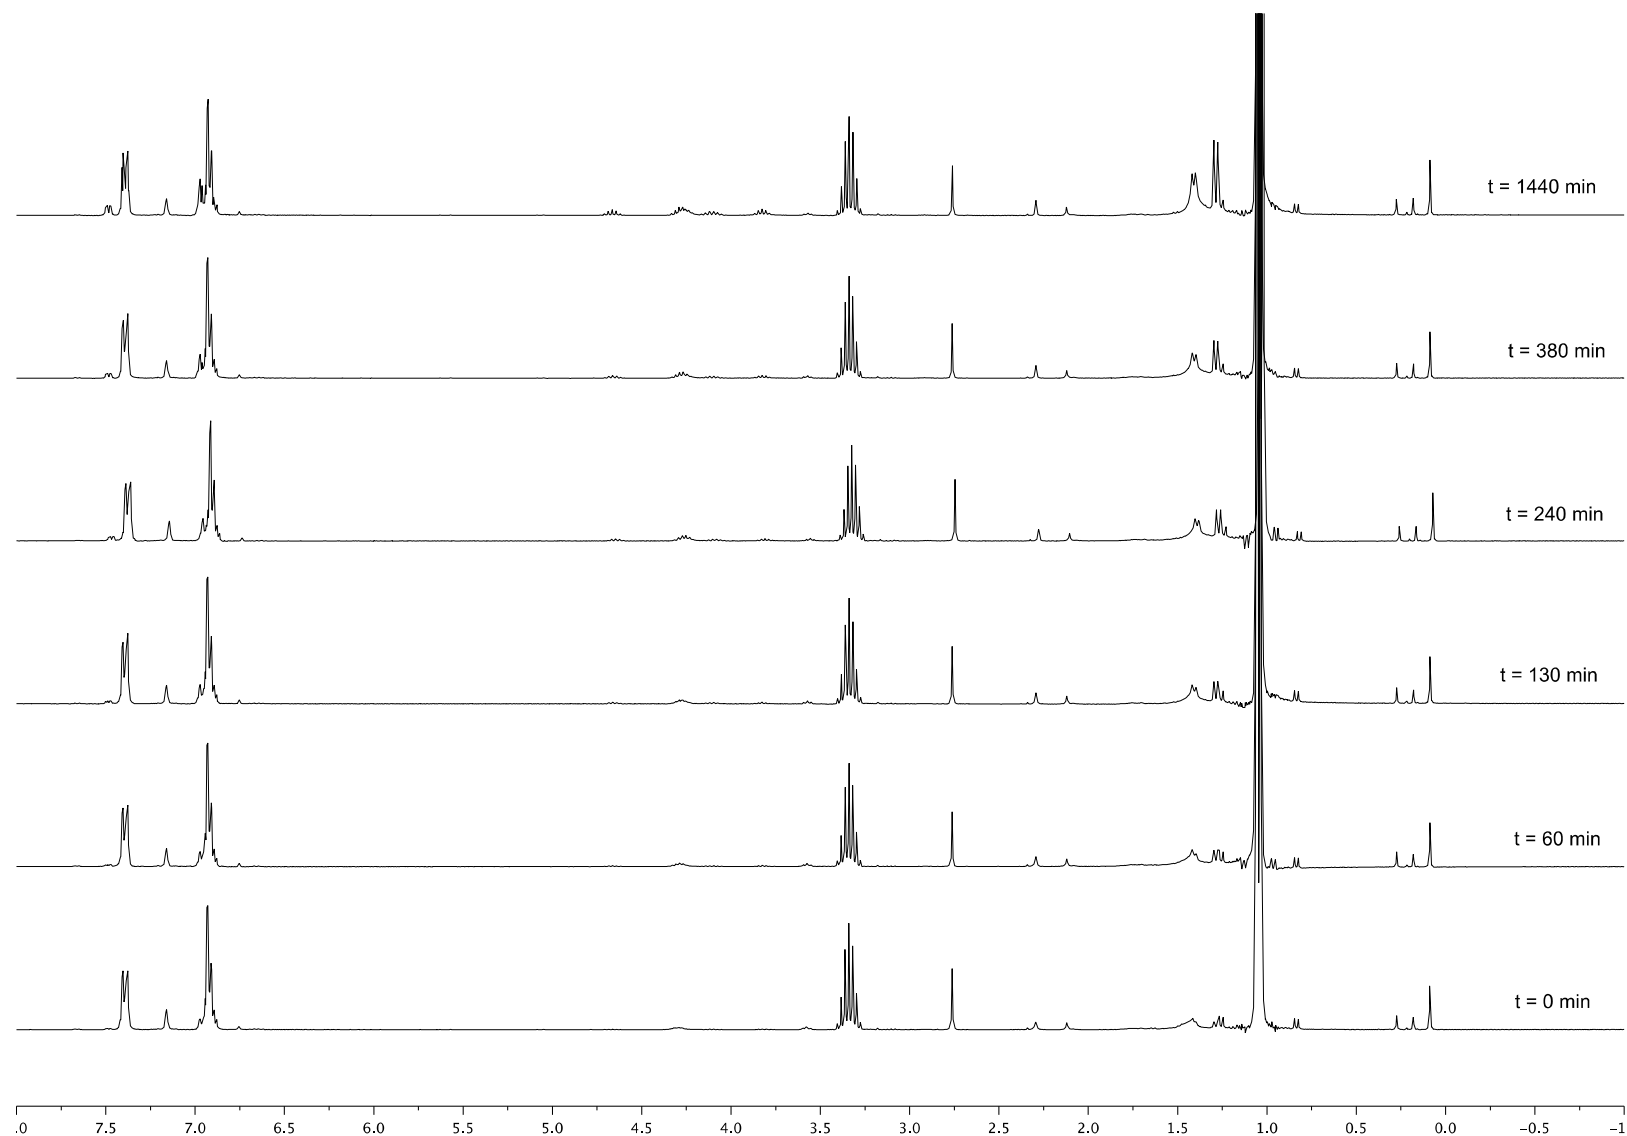

**Figure S19** Stacked  $^1\text{H}$  NMR spectra of a representative catalytic coupling of  $\text{PhC}\equiv\text{CH}$  and  $i\text{-PrN}=\text{C}=\text{Ni-Pr}$  using **1** at 50 °C ( $\text{C}_6\text{D}_6$ , 300 MHz).

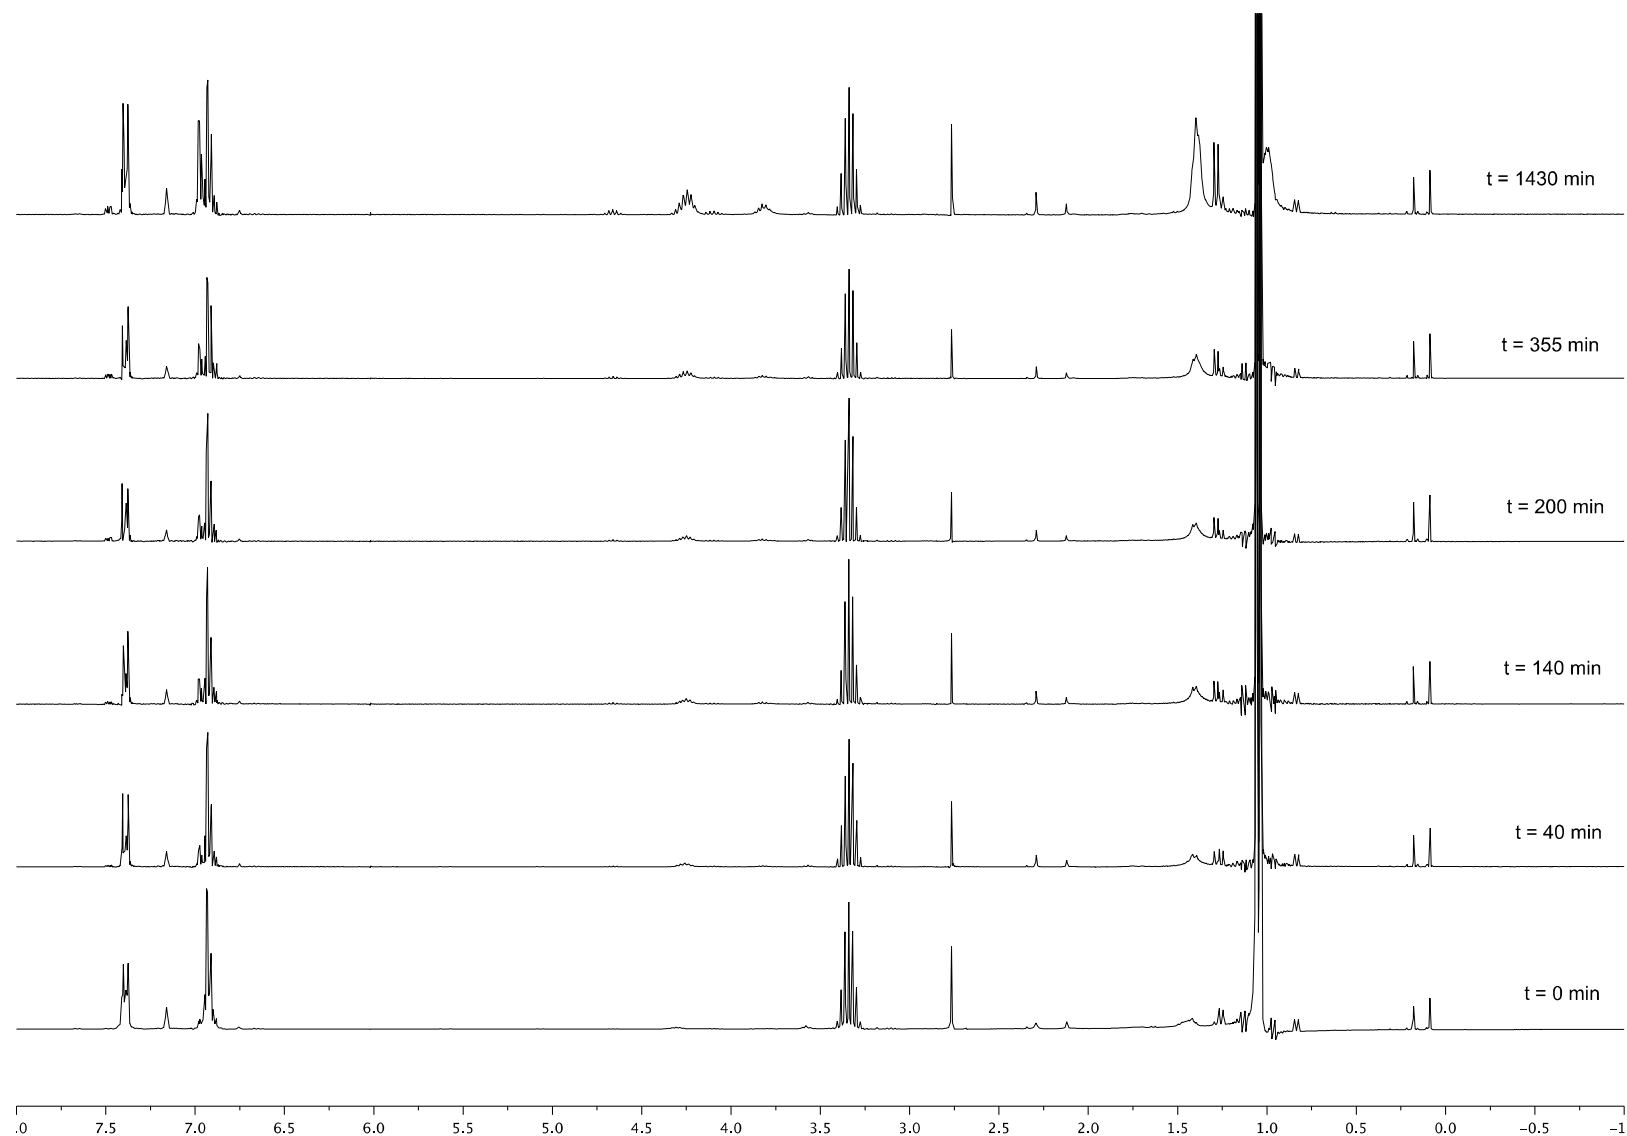

**Figure S20** Stacked  $^1\text{H}$  NMR spectra of a representative catalytic coupling of  $\text{PhC}\equiv\text{CH}$  and  $i\text{-PrN}=\text{C}=\text{Ni-Pr}$  using **1** at  $80\text{ }^\circ\text{C}$  ( $\text{C}_6\text{D}_6$ , 300 MHz).

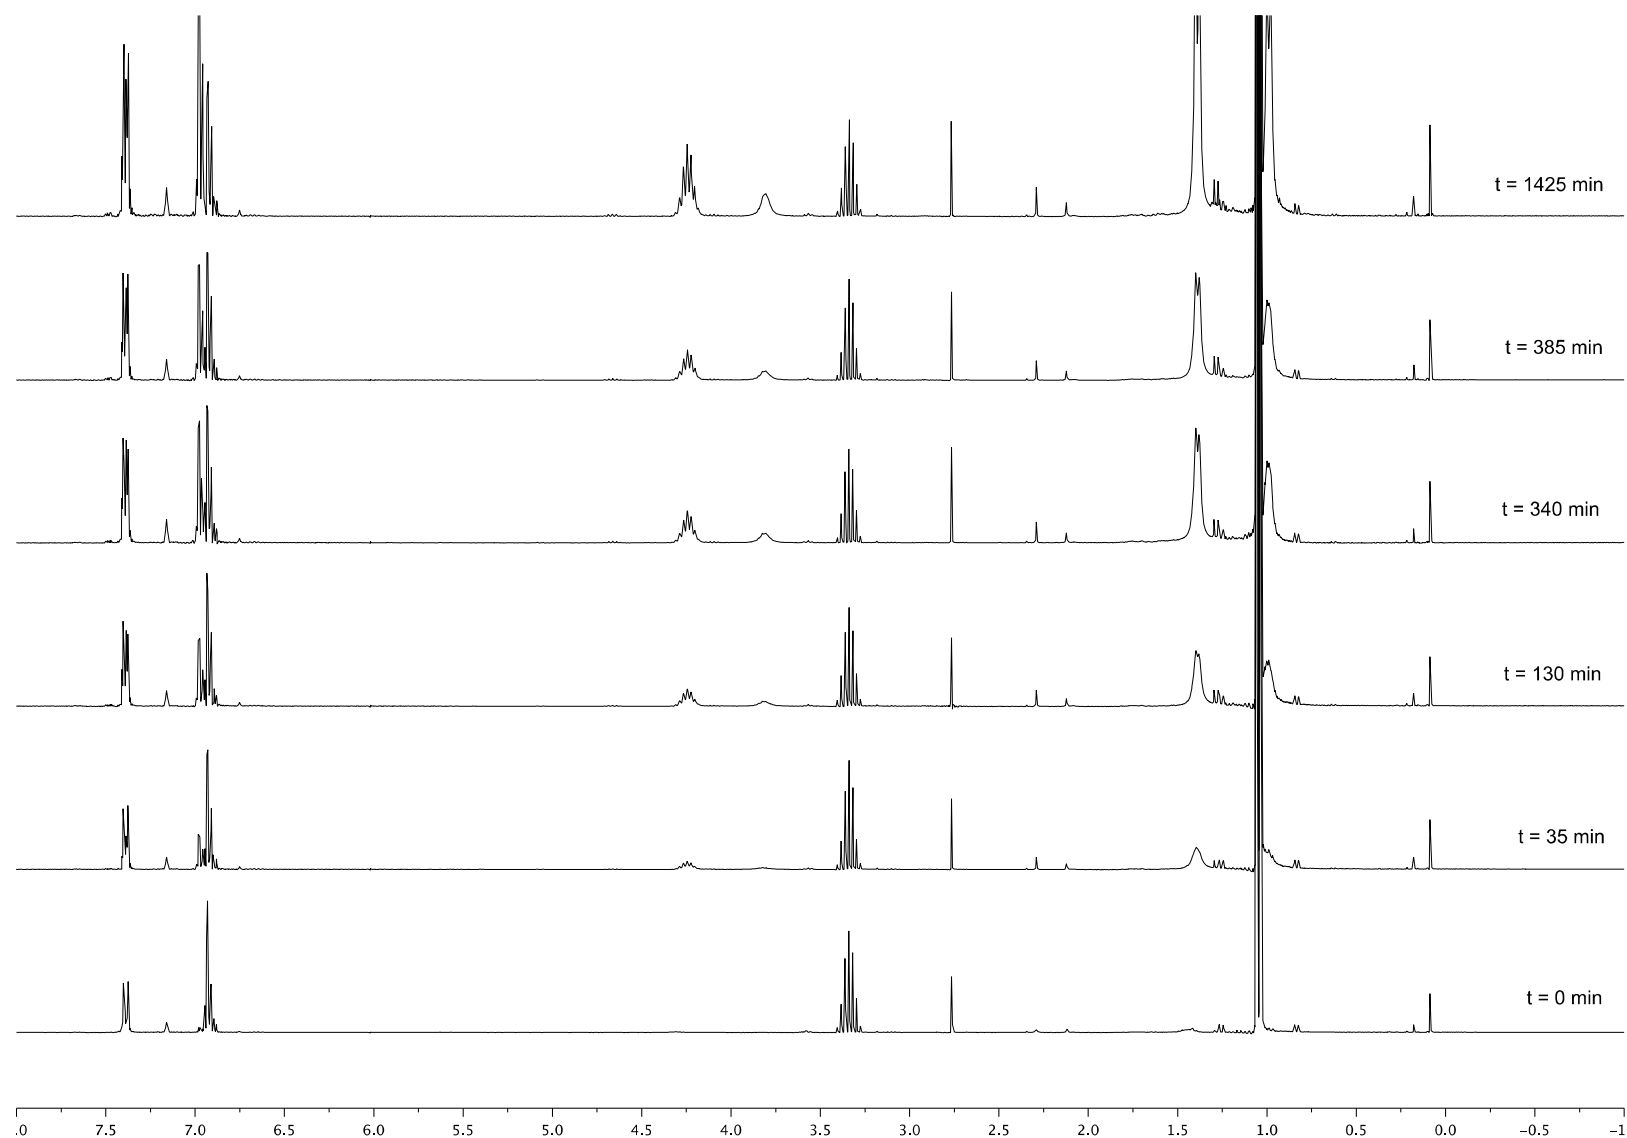

**Figure S21** Assigned  $^1\text{H}$  NMR spectrum of the catalytic coupling of  $\text{PhC}\equiv\text{CH}$  and  $i\text{-PrN}=\text{C}=\text{Ni-Pr}$  using **1** at  $80^\circ\text{C}$  (after 1876 min) ( $\text{C}_6\text{D}_6$ , 300 MHz). Inset shows peak for non-coordinated THF (1 equiv from **1**).

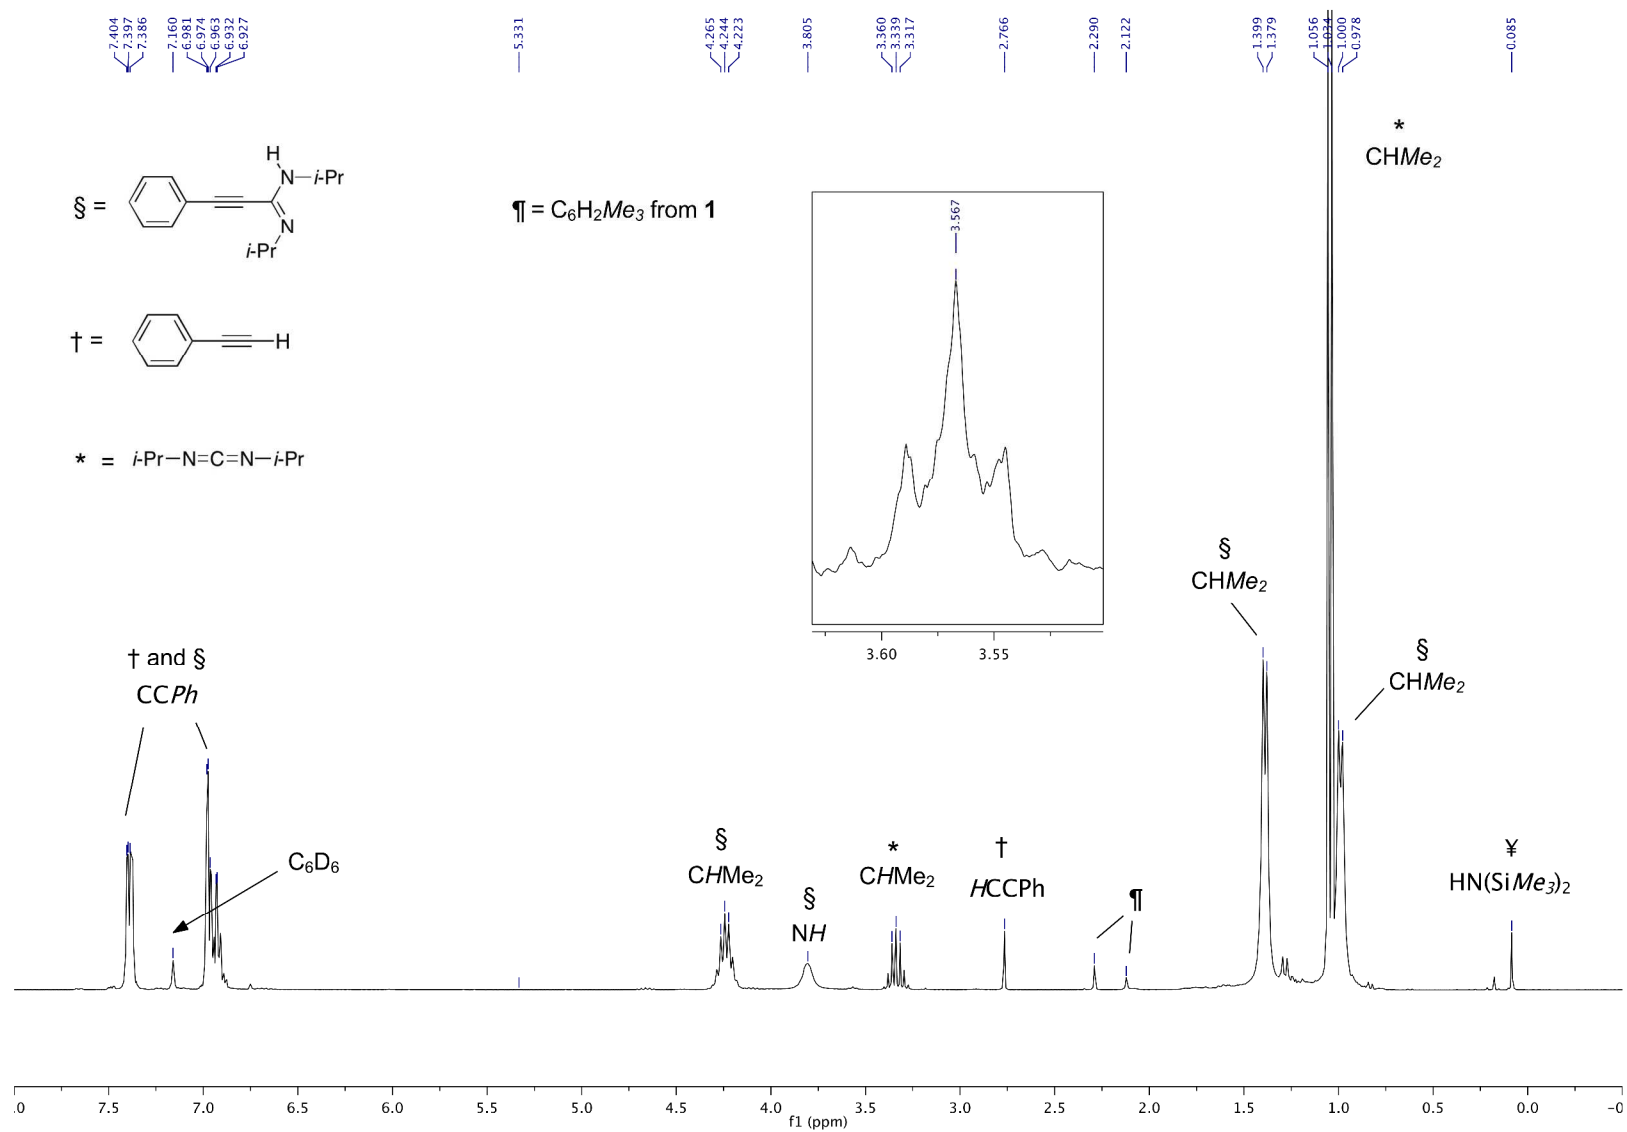

**Figure S22**  $^1\text{H}$  NMR spectrum of isolated  $\text{PhC}\equiv\text{C}\{\text{Ni-Pr}\}\{\text{NH-Pr}\}$  ( $\text{C}_6\text{D}_6$ , 300 MHz).

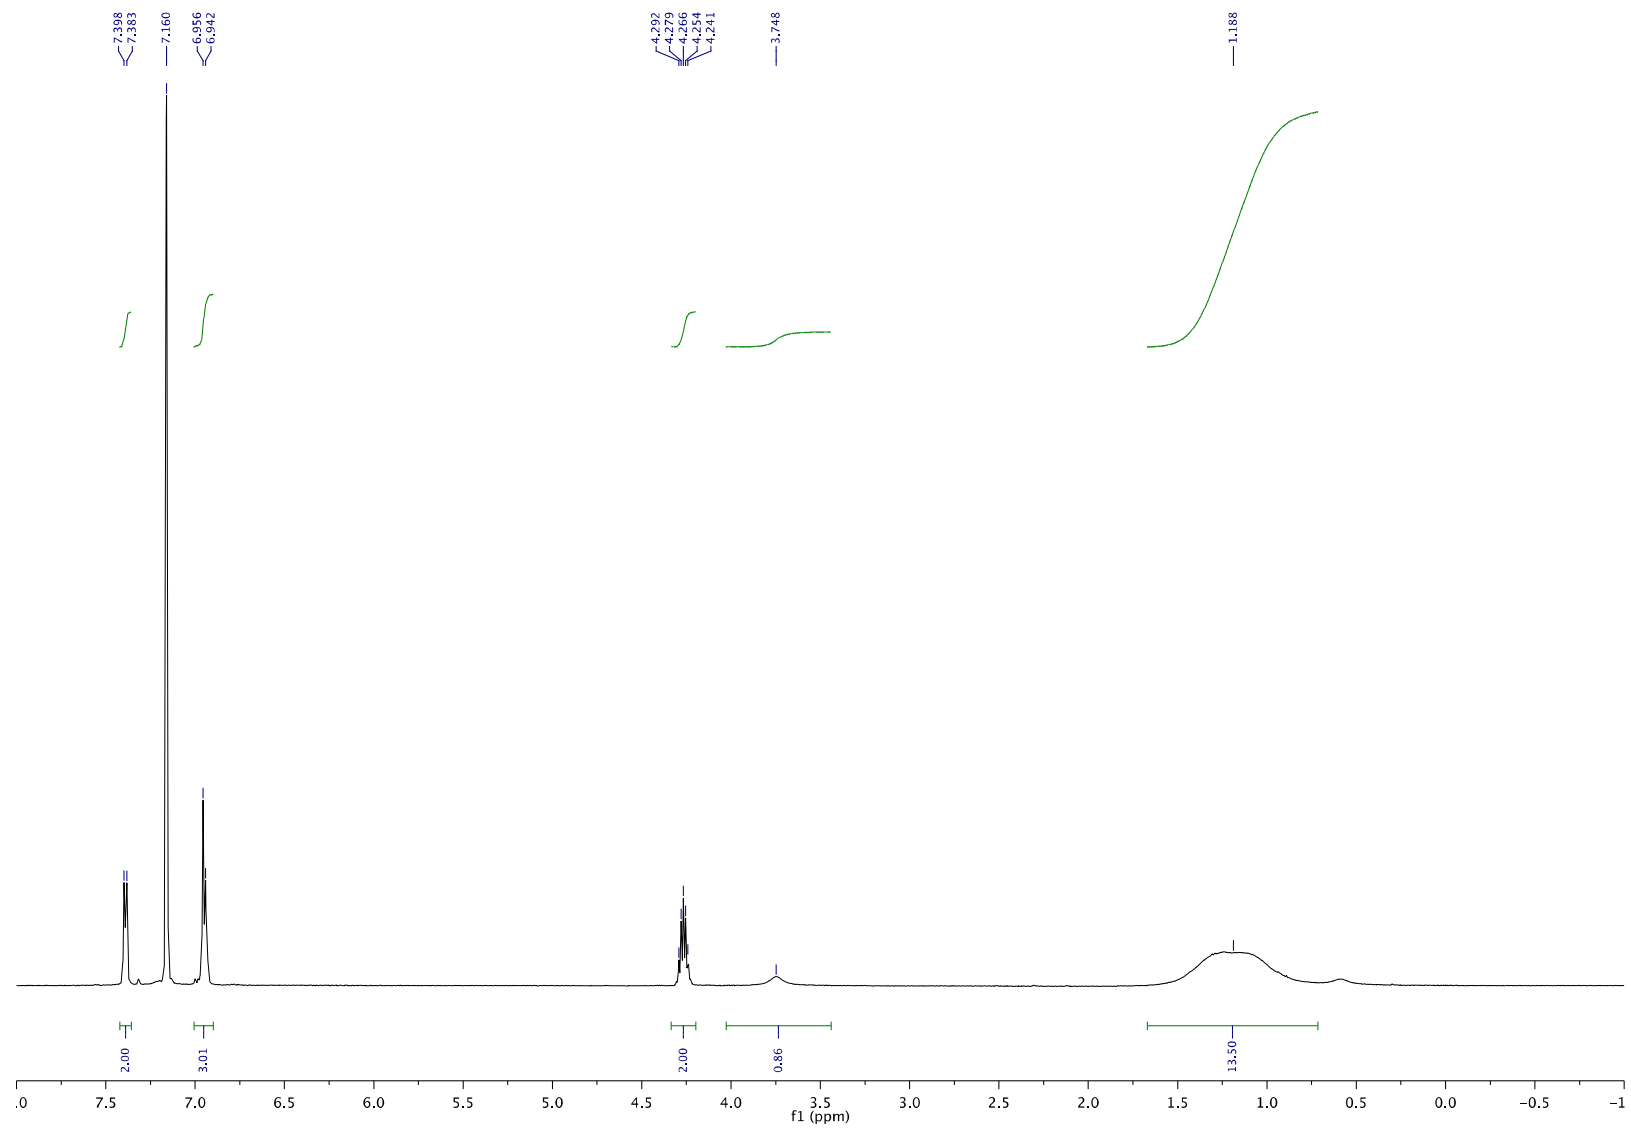

**Table S1** Crystal structure and refinement data for Mg(mesC{NCy}<sub>2</sub>)<sub>2</sub>(THF) (2)

|                                   |                                                     |          |
|-----------------------------------|-----------------------------------------------------|----------|
| Identification code               | RJS047C                                             |          |
| Empirical formula                 | C <sub>48</sub> H <sub>74</sub> Mg N <sub>4</sub> O |          |
| Formula weight                    | 747.42                                              |          |
| Temperature                       | 120(1) K                                            |          |
| Wavelength                        | 1.54180 Å                                           |          |
| Crystal system                    | Tetragonal                                          |          |
| Space group                       | <i>P</i> 4 <sub>3</sub> 2 <sub>1</sub> 2 (No.96)    |          |
| Unit cell dimensions              | a = 10.24350(13) Å                                  | α = 90°. |
|                                   | b = 10.24350(13) Å                                  | β = 90°. |
|                                   | c = 43.7040(7) Å                                    | γ = 90°. |
| Volume                            | 4585.83(11) Å <sup>3</sup>                          |          |
| Z                                 | 4                                                   |          |
| Density (calculated)              | 1.08 Mg/m <sup>3</sup>                              |          |
| Absorption coefficient            | 0.608 mm <sup>-1</sup>                              |          |
| F(000)                            | 1640                                                |          |
| Crystal size                      | 0.25 x 0.09 x 0.05 mm <sup>3</sup>                  |          |
| Theta range for data collection   | 4.05 to 73.79°.                                     |          |
| Index ranges                      | -12 ≤ h ≤ 12, -12 ≤ k ≤ 12, -54 ≤ l ≤ 32            |          |
| Reflections collected             | 33678                                               |          |
| Independent reflections           | 4630 [R(int) = 0.058]                               |          |
| Completeness to theta = 73.79°    | 99.9 %                                              |          |
| Absorption correction             | Gaussian                                            |          |
| Max. and min. transmission        | 1.782 and 0.924                                     |          |
| Refinement method                 | Full-matrix least-squares on F <sup>2</sup>         |          |
| Data / restraints / parameters    | 4630 / 0 / 248                                      |          |
| Goodness-of-fit on F <sup>2</sup> | 1.044                                               |          |
| Final R indices [I > 2σ(I)]       | R1 = 0.037, wR2 = 0.092                             |          |
| R indices (all data)              | R1 = 0.040, wR2 = 0.094                             |          |
| Absolute structure parameter      | -0.02(5)                                            |          |
| Largest diff. peak and hole       | 0.24 and -0.21 e.Å <sup>-3</sup>                    |          |

Data collection SuperNova, Dual, Cu at zero, Atlas , Program package WinGX , Abs. correction 'GAUSSIAN'

Refinement using SHELXL-97 , Drawing using ORTEP-3 for Windows

**Figure S23** ORTEP (ellipsoids 30 %, H-atoms omitted) of Mg(mesC{NCy}<sub>2</sub>)<sub>2</sub>(THF) (**2**)

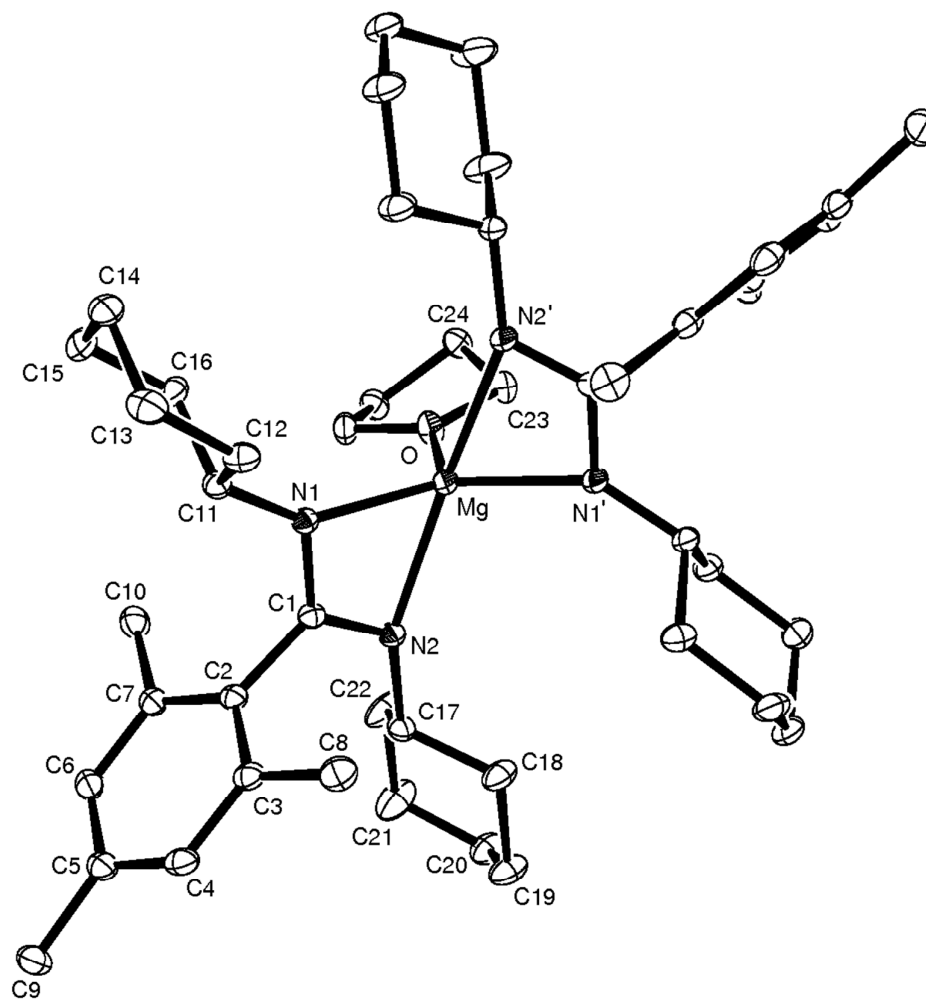



**Table S2** Crystal structure and refinement data for Mg({Me<sub>3</sub>Si}<sub>2</sub>NC{Ni-Pr}<sub>2</sub>)<sub>2</sub>(THF) (**3**)

|                                   |                                                                     |                  |
|-----------------------------------|---------------------------------------------------------------------|------------------|
| Identification code               | rjs121                                                              |                  |
| Empirical formula                 | C <sub>30</sub> H <sub>72</sub> Mg N <sub>6</sub> O Si <sub>4</sub> |                  |
| Formula weight                    | 669.61                                                              |                  |
| Temperature                       | 120.01(10) K                                                        |                  |
| Wavelength                        | 1.5418 Å                                                            |                  |
| Crystal system                    | Monoclinic                                                          |                  |
| Space group                       | <i>P</i> 2 <sub>1</sub> /c (No.14)                                  |                  |
| Unit cell dimensions              | a = 9.9306(2) Å                                                     | α = 90°.         |
|                                   | b = 24.2870(4) Å                                                    | β = 114.059(2)°. |
|                                   | c = 18.9646(4) Å                                                    | γ = 90°.         |
| Volume                            | 4176.61(14) Å <sup>3</sup>                                          |                  |
| Z                                 | 4                                                                   |                  |
| Density (calculated)              | 1.07 Mg/m <sup>3</sup>                                              |                  |
| Absorption coefficient            | 0.186 mm <sup>-1</sup>                                              |                  |
| F(000)                            | 1480                                                                |                  |
| Crystal size                      | 0.32 x 0.27 x 0.11 mm <sup>3</sup>                                  |                  |
| Theta range for data collection   | 3.13 to 73.81°.                                                     |                  |
| Index ranges                      | -12<=h<=12, -29<=k<=29, -21<=l<=21                                  |                  |
| Reflections collected             | 50946                                                               |                  |
| Independent reflections           | 8369 [R(int) = 0.114]                                               |                  |
| Reflections with I>2sigma(I)      | 7105                                                                |                  |
| Completeness to theta = 66.97°    | 98.6 %                                                              |                  |
| Absorption correction             | Semi-empirical from equivalents                                     |                  |
| Max. and min. transmission        | 1.00 and 0.899                                                      |                  |
| Refinement method                 | Full-matrix least-squares on F <sup>2</sup>                         |                  |
| Data / restraints / parameters    | 8369 / 0 / 379                                                      |                  |
| Goodness-of-fit on F <sup>2</sup> | 1.055                                                               |                  |
| Final R indices [I>2sigma(I)]     | R1 = 0.080, wR2 = 0.125                                             |                  |
| R indices (all data)              | R1 = 0.088, wR2 = 0.130                                             |                  |
| Largest diff. peak and hole       | 0.34 and -0.35 e.Å <sup>-3</sup>                                    |                  |

Data collection SuperNova, Dual, Cu at zero, Atlas , Program package WinGX , Abs. correction 'MULTISCAN'

Refinement using SHELXL-97 , Drawing using ORTEP-3 for Windows

**Figure S24** ORTEP (ellipsoids 30 %, H-atoms omitted) of  $\text{Mg}(\{\text{Me}_3\text{Si}\}_2\text{NC}\{\text{Ni-Pr}\}_2)_2(\text{THF})$  (**3**)

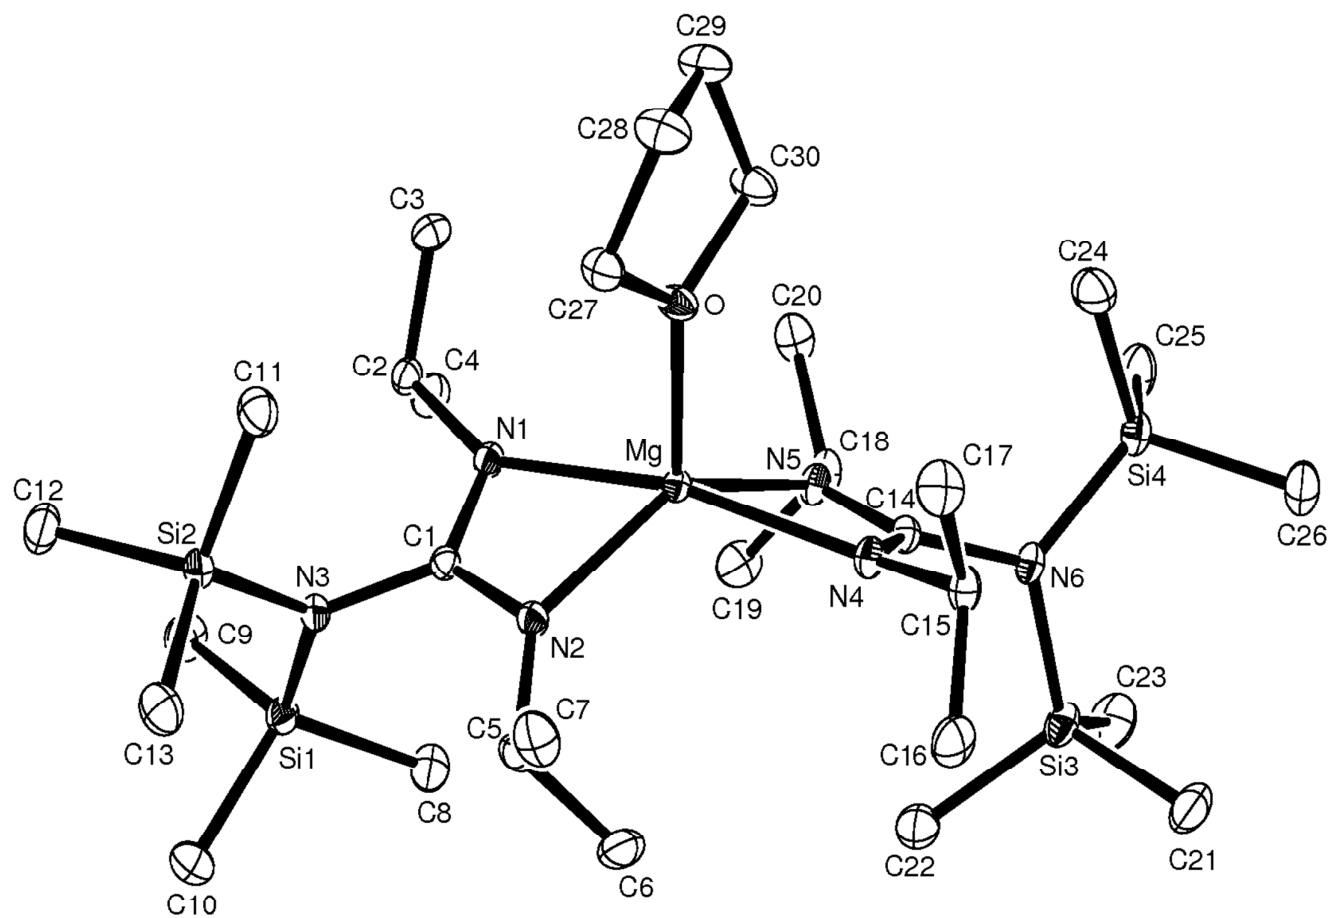

**Table S3** Crystal structure and refinement data for Mg(CCPPh)<sub>2</sub>(THF)<sub>4</sub> (**4**)

|                                   |                                                   |                  |
|-----------------------------------|---------------------------------------------------|------------------|
| Identification code               | rjs084                                            |                  |
| Empirical formula                 | C <sub>32</sub> H <sub>42</sub> Mg O <sub>4</sub> |                  |
| Formula weight                    | 514.97                                            |                  |
| Temperature                       | 120.01(10) K                                      |                  |
| Wavelength                        | 1.54180 Å                                         |                  |
| Crystal system                    | Monoclinic                                        |                  |
| Space group                       | <i>C</i> 2/c (No.15)                              |                  |
| Unit cell dimensions              | a = 11.0212(6) Å                                  | α = 90°.         |
|                                   | b = 22.0516(10) Å                                 | β = 105.758(7)°. |
|                                   | c = 12.0459(8) Å                                  | γ = 90°.         |
| Volume                            | 2817.6(3) Å <sup>3</sup>                          |                  |
| Z                                 | 4                                                 |                  |
| Density (calculated)              | 1.21 Mg/m <sup>3</sup>                            |                  |
| Absorption coefficient            | 0.814 mm <sup>-1</sup>                            |                  |
| F(000)                            | 1112                                              |                  |
| Crystal size                      | 0.55 x 0.41 x 0.24 mm <sup>3</sup>                |                  |
| Theta range for data collection   | 4.01 to 73.82°.                                   |                  |
| Index ranges                      | -13 ≤ h ≤ 13, -26 ≤ k ≤ 27, -14 ≤ l ≤ 14          |                  |
| Reflections collected             | 16457                                             |                  |
| Independent reflections           | 2836 [R(int) = 0.059]                             |                  |
| Completeness to theta = 73.82°    | 99.3 %                                            |                  |
| Absorption correction             | Semi-empirical from equivalents                   |                  |
| Max. and min. transmission        | 1.00 and 0.63                                     |                  |
| Refinement method                 | Full-matrix least-squares on F <sup>2</sup>       |                  |
| Data / restraints / parameters    | 2836 / 3 / 191                                    |                  |
| Goodness-of-fit on F <sup>2</sup> | 0.994                                             |                  |
| Final R indices [I > 2σ(I)]       | R1 = 0.075, wR2 = 0.221                           |                  |
| R indices (all data)              | R1 = 0.078, wR2 = 0.229                           |                  |
| Largest diff. peak and hole       | 1.385 and -0.341 e.Å <sup>-3</sup>                |                  |

The large residual electron density is the result of poor data, leading to a spurious peak. One of the THF molecules is disordered over two positions and was modeled with loose (SADI) constraints. The molecule lies on a 2-fold rotation axis.

Data collection SuperNova, Dual, Cu at zero, Atlas , Program package WinGX , Abs. correction 'MULTISCAN'  
Refinement using SHELXL-97 , Drawing using ORTEP-3 for Windows

**Figure S25** ORTEP (ellipsoids 30 %, H-atoms omitted) of  $\text{Mg}(\text{CCPh})_2(\text{THF})_4$  (**4**)

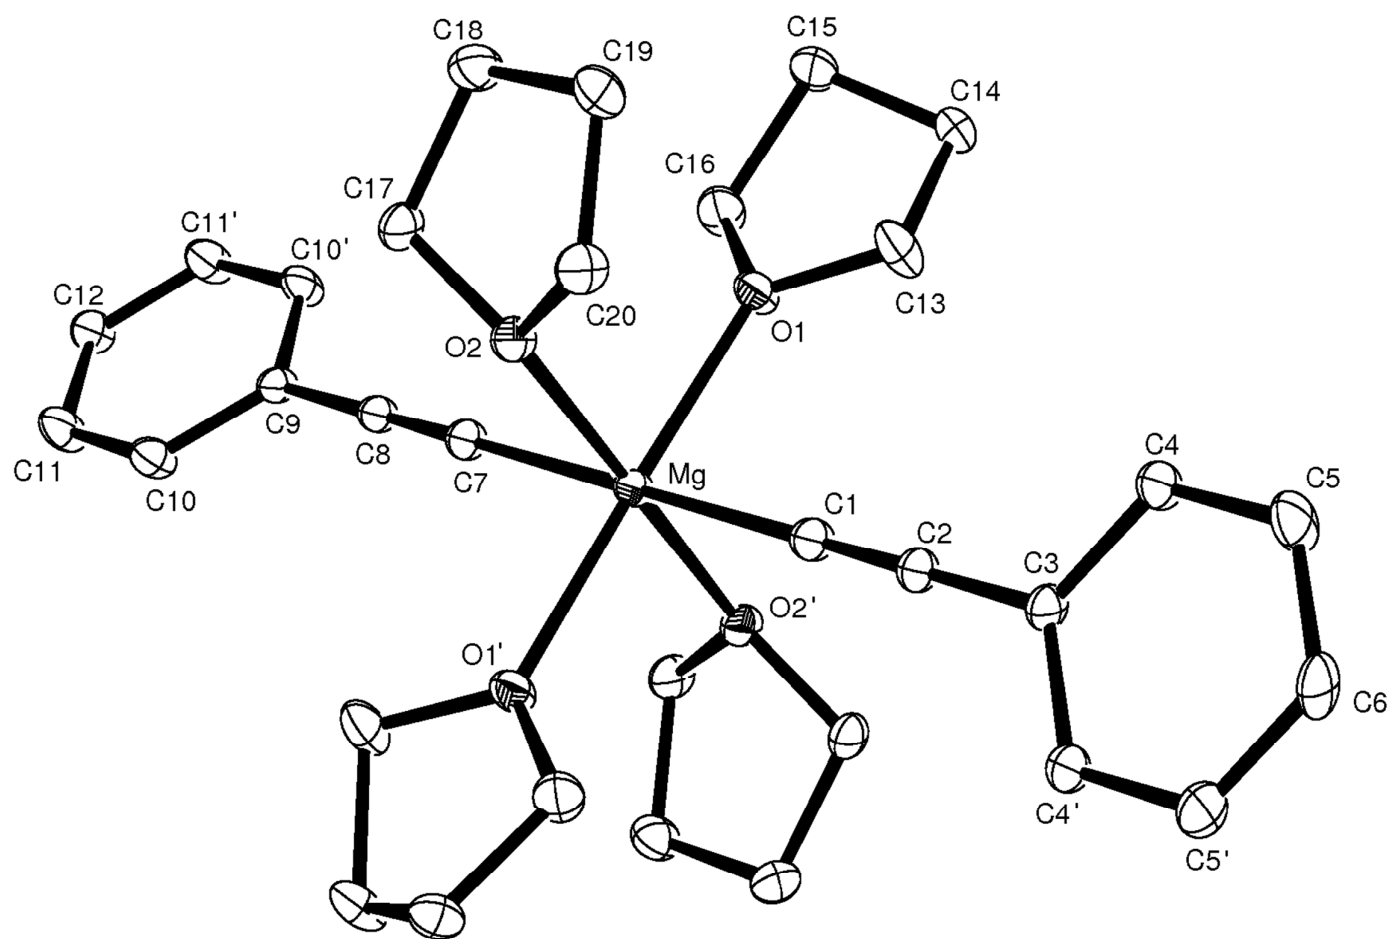

**Table S4** Crystal structure and refinement data for Mg(PhC≡C{Ni-Pr}<sub>2</sub>)(THF)<sub>2</sub> (**5**(THF))

Table 1. Crystal data and structure refinement for Mg(PhCCC{N<sup>i</sup>Pr}<sub>2</sub>)(THF)<sub>2</sub>.

|                                   |                                                                  |                 |
|-----------------------------------|------------------------------------------------------------------|-----------------|
| Identification code               | rjs163                                                           |                 |
| Empirical formula                 | C <sub>38</sub> H <sub>54</sub> Mg N <sub>4</sub> O <sub>2</sub> |                 |
| Formula weight                    | 623.16                                                           |                 |
| Temperature                       | 120.01(10) K                                                     |                 |
| Wavelength                        | 1.5418 Å                                                         |                 |
| Crystal system                    | Triclinic                                                        |                 |
| Space group                       | $P\bar{1}$ (No.2)                                                |                 |
| Unit cell dimensions              | a = 9.3730(3) Å                                                  | α = 78.282(3)°. |
|                                   | b = 10.0360(4) Å                                                 | β = 70.533(4)°. |
|                                   | c = 10.5466(4) Å                                                 | γ = 77.850(3)°. |
| Volume                            | 904.86(6) Å <sup>3</sup>                                         |                 |
| Z                                 | 1                                                                |                 |
| Density (calculated)              | 1.14 Mg/m <sup>3</sup>                                           |                 |
| Absorption coefficient            | 0.703 mm <sup>-1</sup>                                           |                 |
| F(000)                            | 338                                                              |                 |
| Crystal size                      | 0.34 x 0.30 x 0.21 mm <sup>3</sup>                               |                 |
| Theta range for data collection   | 4.55 to 73.91°.                                                  |                 |
| Index ranges                      | -11 ≤ h ≤ 11, -12 ≤ k ≤ 11, -13 ≤ l ≤ 11                         |                 |
| Reflections collected             | 10124                                                            |                 |
| Independent reflections           | 3565 [R(int) = 0.016]                                            |                 |
| Completeness to theta = 66.97°    | 99.8 %                                                           |                 |
| Absorption correction             | Semi-empirical from equivalents                                  |                 |
| Max. and min. transmission        | 1.000 and 0.632                                                  |                 |
| Refinement method                 | Full-matrix least-squares on F <sup>2</sup>                      |                 |
| Data / restraints / parameters    | 3565 / 0 / 205                                                   |                 |
| Goodness-of-fit on F <sup>2</sup> | 1.025                                                            |                 |
| Final R indices [I > 2σ(I)]       | R1 = 0.035, wR2 = 0.090                                          |                 |
| R indices (all data)              | R1 = 0.036, wR2 = 0.091                                          |                 |
| Largest diff. peak and hole       | 0.19 and -0.17 e.Å <sup>-3</sup>                                 |                 |

The molecule lies on an inversion centre

Data collection SuperNova, Dual, Cu at zero, Atlas , Program package WinGX , Abs. correction 'MULTISCAN'  
Refinement using SHELXL-97 , Drawing using ORTEP-3 for Windows

**Figure S26** ORTEP (ellipsoids 30 %, H-atoms omitted) of  $\text{Mg}(\text{PhC}\equiv\text{C}\{\text{Ni-Pr}\}_2)_2(\text{THF})_2$  (**5**(THF))

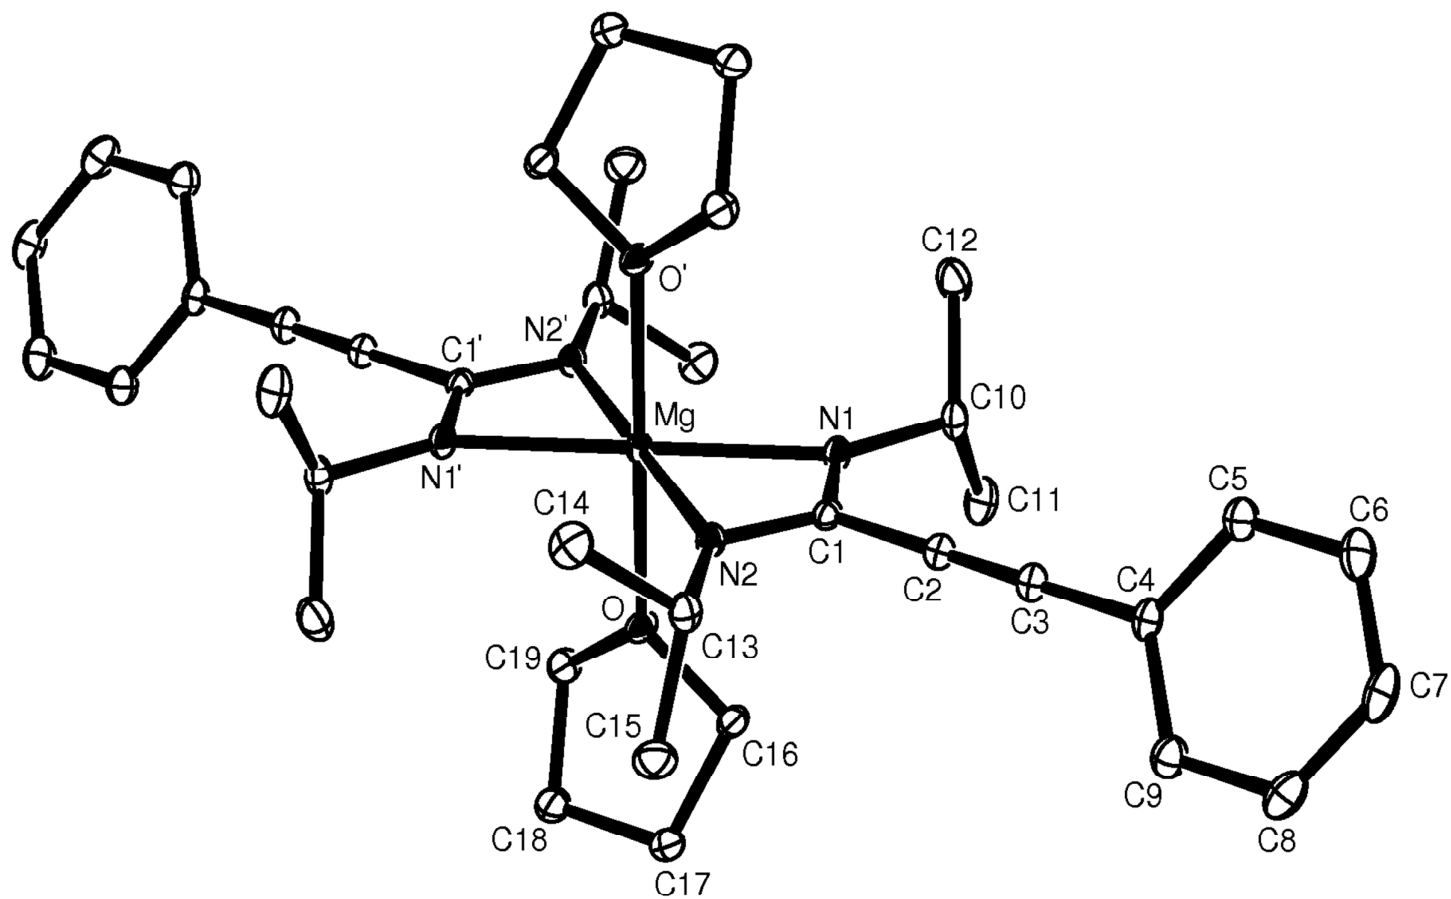

**Table S5** Crystal structure and refinement data for [Mg(PhC=CC{Ni-Pr}<sub>2</sub>)Br(Et<sub>2</sub>O)]<sub>2</sub> ([6]<sub>2</sub>)

|                                   |                                                      |          |
|-----------------------------------|------------------------------------------------------|----------|
| Identification code               | RJS037                                               |          |
| Empirical formula                 | C <sub>19</sub> H <sub>29</sub> BrMgN <sub>2</sub> O |          |
| Formula weight                    | 405.66                                               |          |
| Temperature                       | 120(1) K                                             |          |
| Wavelength                        | 1.54180 Å                                            |          |
| Crystal system                    | Orthorhombic                                         |          |
| Space group                       | <i>Pca</i> 2 <sub>1</sub> (No.29)                    |          |
| Unit cell dimensions              | a = 18.05830(13) Å                                   | α = 90°. |
|                                   | b = 12.40280(8) Å                                    | β = 90°. |
|                                   | c = 19.33740(13) Å                                   | γ = 90°. |
| Volume                            | 4331.06(5) Å <sup>3</sup>                            |          |
| Z                                 | 8                                                    |          |
| Density (calculated)              | 1.24 Mg/m <sup>3</sup>                               |          |
| Absorption coefficient            | 2.916 mm <sup>-1</sup>                               |          |
| F(000)                            | 1696                                                 |          |
| Crystal size                      | 0.65 x 0.57 x 0.41 mm <sup>3</sup>                   |          |
| Theta range for data collection   | 3.56 to 73.91°.                                      |          |
| Index ranges                      | -22 ≤ h ≤ 20, -15 ≤ k ≤ 10, -24 ≤ l ≤ 24             |          |
| Reflections collected             | 29431                                                |          |
| Independent reflections           | 8510 [R(int) = 0.029]                                |          |
| Completeness to theta = 73.91°    | 98.7 %                                               |          |
| Absorption correction             | Semi-empirical from equivalents                      |          |
| Max. and min. transmission        | 1.00000 and 0.70232                                  |          |
| Refinement method                 | Full-matrix least-squares on F <sup>2</sup>          |          |
| Data / restraints / parameters    | 8510 / 1 / 434                                       |          |
| Goodness-of-fit on F <sup>2</sup> | 1.058                                                |          |
| Final R indices [I > 2σ(I)]       | R1 = 0.034, wR2 = 0.089                              |          |
| R indices (all data)              | R1 = 0.034, wR2 = 0.089                              |          |
| Absolute structure parameter      | 0.00(7)                                              |          |
| Largest diff. peak and hole       | 0.52 and -0.69 e.Å <sup>-3</sup>                     |          |

Racemic Twin (TWIN -1 0 0 0 -1 0 0 0 -1, BASF 0.41743)

Data collection SuperNova, Dual, Cu at zero, Atlas , Program package WinGX , Abs. correction 'MULTISCAN'

Refinement using SHELXL-97 , Drawing using ORTEP-3 for Windows

**Figure S27** ORTEP (ellipsoids 30 %, H-atoms omitted) of  $[\text{Mg}(\text{PhC}\equiv\text{CC}\{\text{Ni-Pr}\}_2)\text{Br}(\text{Et}_2\text{O})]_2$  ( $[\mathbf{6}]_2$ )

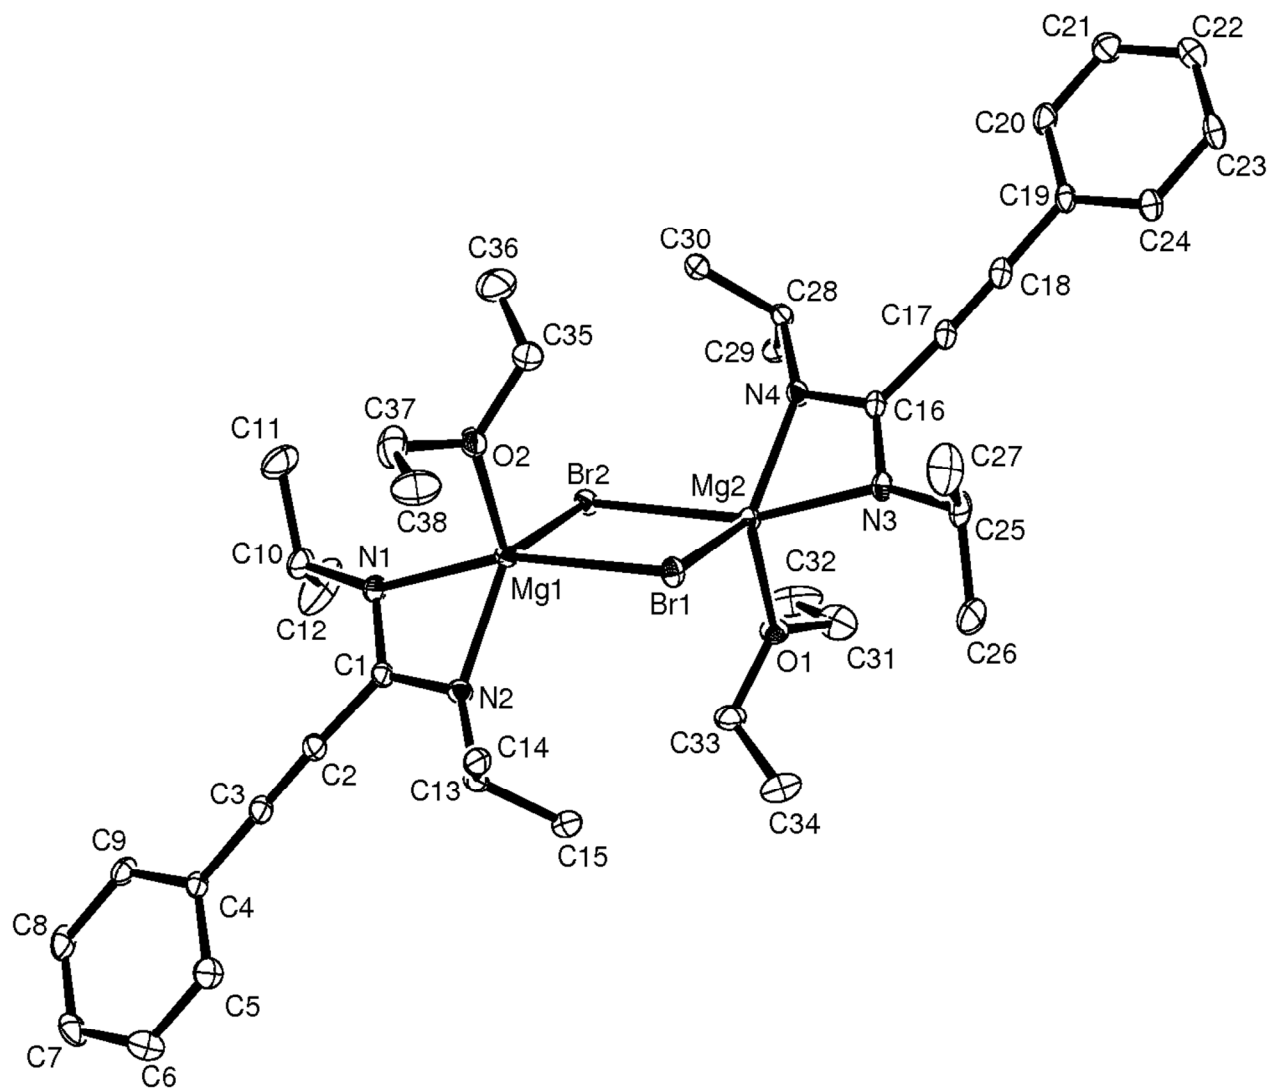

Supplement: Supplementary file 1 [file 4006627]
